# Supplementary material
Source: PubMed Central journal article supplement (PMC5332301)
Supplement: NIHMS816937-supplement-1.pdf [file NIHMS816937-supplement-1.pdf]

**Supplemental Figure S1A.****Proteins identified in the Molm14 Screen Alone**

|                                                                                              | <b>Molm14 #<br/>of<br/>peptides</b> | <b>IgG<br/># of<br/>peptides</b> |
|----------------------------------------------------------------------------------------------|-------------------------------------|----------------------------------|
| 26S proteasome non-ATPase regulatory subunit 2 OS=Homo sapiens GN=PSMD2 PE=1 SV=3            | 2                                   | 0                                |
| 5'-AMP-activated protein kinase subunit gamma-1 OS=Homo sapiens GN=PRKAG1 PE=1 SV=1          | 2                                   | 1                                |
| Abnormal spindle-like microcephaly-associated protein OS=Homo sapiens GN=ASPM PE=1 SV=2      | 6                                   | 1                                |
| Adenosylhomocysteinase OS=Homo sapiens GN=AHCY PE=1 SV=4                                     | 4                                   | 2                                |
| ADP-ribosylation factor-like protein 8B OS=Homo sapiens GN=ARL8B PE=1 SV=1                   | 3                                   | 0                                |
| A-kinase anchor protein 7 isoform gamma OS=Homo sapiens GN=AKAP7 PE=2 SV=1                   | 6                                   | 3                                |
| A-kinase anchor protein 8-like OS=Homo sapiens GN=AKAP8L PE=1 SV=3                           | 4                                   | 2                                |
| Alpha-(1,6)-fucosyltransferase OS=Homo sapiens GN=FUT8 PE=1 SV=2                             | 3                                   | 1                                |
| Alpha-actinin-4 OS=Homo sapiens GN=ACTN4 PE=1 SV=2                                           | 32                                  | 16                               |
| Alpha-enolase OS=Homo sapiens GN=ENO1 PE=1 SV=2                                              | 7                                   | 1                                |
| Aminopeptidase N OS=Homo sapiens GN=ANPEP PE=1 SV=4                                          | 17                                  | 2                                |
| Ankyrin OS=Homo sapiens GN=ANKRD14 PE=1 SV=2                                                 | 5                                   | 1                                |
| AP-2 complex subunit alpha-2 OS=Homo sapiens GN=AP2A2 PE=1 SV=2                              | 2                                   | 0                                |
| AP-2 complex subunit mu OS=Homo sapiens GN=AP2M1 PE=1 SV=2                                   | 5                                   | 0                                |
| Ataxin-2-like protein OS=Homo sapiens GN=ATXN2L PE=1 SV=2                                    | 12                                  | 6                                |
| ATPase family AAA domain-containing protein 3A OS=Homo sapiens GN=ATAD3A PE=1 SV=2           | 41                                  | 15                               |
| ATP-binding cassette sub-family E member 1 OS=Homo sapiens GN=ABCE1 PE=1 SV=1                | 3                                   | 1                                |
| ATP-dependent RNA helicase DDX55 OS=Homo sapiens GN=DDX55 PE=1 SV=3                          | 2                                   | 1                                |
| Aurora kinase A-interacting protein OS=Homo sapiens GN=AURKAIP1 PE=1 SV=1                    | 3                                   | 1                                |
| Bcl-2 homologous antagonist/killer OS=Homo sapiens GN=BAK1 PE=1 SV=1                         | 2                                   | 0                                |
| Brain acid soluble protein 1 OS=Homo sapiens GN=BASP1 PE=1 SV=2                              | 2                                   | 0                                |
| Calcium homeostasis endoplasmic reticulum protein OS=Homo sapiens GN=CHERP PE=1 SV=3         | 3                                   | 0                                |
| Calmodulin-like protein 3 OS=Homo sapiens GN=CALML3 PE=1 SV=2                                | 3                                   | 0                                |
| Calmodulin-like protein 5 OS=Homo sapiens GN=CALML5 PE=1 SV=2                                | 6                                   | 2                                |
| Calponin-2 OS=Homo sapiens GN=CNN2 PE=1 SV=4                                                 | 2                                   | 0                                |
| Catechol O-methyltransferase OS=Homo sapiens GN=COMT PE=1 SV=2                               | 2                                   | 0                                |
| CD44 antigen OS=Homo sapiens GN=CD44 PE=1 SV=2                                               | 12                                  | 2                                |
| Cell cycle regulator Mat89Bb homolog OS=Homo sapiens GN=C12orf11 PE=1 SV=2                   | 3                                   | 1                                |
| Cell division cycle protein 23 homolog OS=Homo sapiens GN=CDC23 PE=1 SV=3                    | 3                                   | 0                                |
| Chloride intracellular channel protein 1 OS=Homo sapiens GN=CLIC1 PE=1 SV=4                  | 9                                   | 4                                |
| CLIP-associating protein 2 OS=Homo sapiens GN=CLASP2 PE=1 SV=2                               | 6                                   | 2                                |
| Coatomer subunit gamma-2 OS=Homo sapiens GN=COPG2 PE=1 SV=1                                  | 2                                   | 0                                |
| Coiled-coil domain-containing protein 86 OS=Homo sapiens GN=CCDC86 PE=1 SV=1                 | 5                                   | 2                                |
| Complement decay-accelerating factor OS=Homo sapiens GN=CD55 PE=1 SV=4                       | 3                                   | 0                                |
| C-terminal-binding protein 1 OS=Homo sapiens GN=CTBP1 PE=1 SV=2                              | 2                                   | 0                                |
| Cyclin-K OS=Homo sapiens GN=CCNK PE=1 SV=2                                                   | 2                                   | 0                                |
| Desmoplakin OS=Homo sapiens GN=DSP PE=1 SV=3                                                 | 13                                  | 5                                |
| DNA ligase 3 OS=Homo sapiens GN=LIG3 PE=1 SV=2                                               | 2                                   | 0                                |
| DNA mismatch repair protein Msh2 OS=Homo sapiens GN=MSH2 PE=1 SV=1                           | 6                                   | 3                                |
| DNA topoisomerase 3-beta-1 OS=Homo sapiens GN=TOP3B PE=1 SV=1                                | 2                                   | 0                                |
| DNA-binding protein RFX5 OS=Homo sapiens GN=RFX5 PE=1 SV=1                                   | 2                                   | 1                                |
| DNA-directed RNA polymerase II subunit RPB3 OS=Homo sapiens GN=POLR2C PE=1 SV=2              | 2                                   | 0                                |
| E3 ubiquitin-protein ligase DTX3L OS=Homo sapiens GN=DTX3L PE=1 SV=1                         | 3                                   | 1                                |
| Ephrin type-A receptor 10 OS=Homo sapiens GN=EPHA10 PE=2 SV=1                                | 6                                   | 2                                |
| Eukaryotic translation initiation factor 3 subunit D OS=Homo sapiens GN=EIF3D PE=1 SV=1      | 8                                   | 3                                |
| Eukaryotic translation initiation factor 3 subunit L OS=Homo sapiens GN=EIF3L PE=1 SV=1      | 4                                   | 2                                |
| Eukaryotic translation initiation factor 4 gamma 1 OS=Homo sapiens GN=EIF4G1 PE=1 SV=4       | 2                                   | 1                                |
| Exportin-5 OS=Homo sapiens GN=XPO5 PE=1 SV=1                                                 | 5                                   | 2                                |
| Fibrinogen alpha chain OS=Homo sapiens GN=FGA PE=1 SV=2                                      | 18                                  | 0                                |
| Fibrinogen beta chain OS=Homo sapiens GN=FGB PE=1 SV=2                                       | 16                                  | 0                                |
| Fibrinogen gamma chain OS=Homo sapiens GN=FGG PE=1 SV=3                                      | 11                                  | 0                                |
| Formin-binding protein 4 OS=Homo sapiens GN=FNBP4 PE=1 SV=2                                  | 5                                   | 0                                |
| Galectin-7 OS=Homo sapiens GN=LGALS7 PE=1 SV=2                                               | 3                                   | 0                                |
| General transcription factor 3C polypeptide 1 OS=Homo sapiens GN=GTF3C1 PE=1 SV=4            | 7                                   | 3                                |
| General transcription factor 3C polypeptide 4 OS=Homo sapiens GN=GTF3C4 PE=1 SV=2            | 6                                   | 0                                |
| General vesicular transport factor p115 OS=Homo sapiens GN=USO1 PE=1 SV=2                    | 2                                   | 1                                |
| Glioma tumor suppressor candidate region gene 2 protein OS=Homo sapiens GN=GLTSCR2 PE=1 SV=2 | 2                                   | 1                                |
| Glucose-6-phosphate isomerase OS=Homo sapiens GN=GPI PE=1 SV=4                               | 4                                   | 1                                |

|                                                                                                       |    |    |
|-------------------------------------------------------------------------------------------------------|----|----|
| Glutamate-rich WD repeat-containing protein 1 OS=Homo sapiens GN=GRWD1 PE=1 SV=1                      | 6  | 1  |
| Glutathione S-transferase omega-1 OS=Homo sapiens GN=GSTO1 PE=1 SV=2                                  | 4  | 1  |
| GMP synthase [glutamine-hydrolyzing] OS=Homo sapiens GN=GMPS PE=1 SV=1                                | 2  | 0  |
| Guanine nucleotide-binding protein-like 3 OS=Homo sapiens GN=GNL3 PE=1 SV=2                           | 4  | 0  |
| HAUS augmin-like complex subunit 3 OS=Homo sapiens GN=HAUS3 PE=1 SV=1                                 | 2  | 0  |
| Heat shock 70 kDa protein 1A/1B OS=Homo sapiens GN=HSPA1A PE=1 SV=5                                   | 30 | 9  |
| Heat shock protein beta-1 OS=Homo sapiens GN=HSPB1 PE=1 SV=2                                          | 6  | 0  |
| Heparan sulfate 2-O-sulfotransferase 1 OS=Homo sapiens GN=HS2ST1 PE=1 SV=1                            | 3  | 0  |
| Inositol 1,4,5-trisphosphate receptor type 1 OS=Homo sapiens GN=ITPR1 PE=1 SV=2                       | 6  | 1  |
| Insulin-like growth factor 2 mRNA-binding protein 1 OS=Homo sapiens GN=IGF2BP1 PE=1 SV=2              | 64 | 1  |
| Insulin-like growth factor 2 mRNA-binding protein 2 OS=Homo sapiens GN=IGF2BP2 PE=1 SV=2              | 4  | 0  |
| Interferon regulatory factor 2-binding protein 1 OS=Homo sapiens GN=IRF2BP1 PE=1 SV=1                 | 15 | 3  |
| Interferon-induced, double-stranded RNA-activated protein kinase OS=Homo sapiens GN=EIF2AK2 PE=1 SV=2 | 22 | 7  |
| Keratin, type I cytoskeletal 13 OS=Homo sapiens GN=KRT13 PE=1 SV=4                                    | 3  | 1  |
| Keratin, type I cytoskeletal 17 OS=Homo sapiens GN=KRT17 PE=1 SV=2                                    | 45 | 19 |
| Keratin, type II cytoskeletal 6A OS=Homo sapiens GN=KRT6A PE=1 SV=3                                   | 47 | 16 |
| Keratin, type II cytoskeletal 6B OS=Homo sapiens GN=KRT6B PE=1 SV=5                                   | 3  | 0  |
| Keratin, type II cytoskeletal 73 OS=Homo sapiens GN=KRT73 PE=1 SV=1                                   | 10 | 3  |
| Kinesin-like protein KIF13A OS=Homo sapiens GN=KIF13A PE=1 SV=2                                       | 5  | 2  |
| KRR1 small subunit processome component homolog OS=Homo sapiens GN=KRR1 PE=1 SV=4                     | 2  | 1  |
| Lamin-B1 OS=Homo sapiens GN=LMNB1 PE=1 SV=2                                                           | 16 | 5  |
| Lamin-B2 OS=Homo sapiens GN=LMNB2 PE=1 SV=3                                                           | 6  | 1  |
| Leucine zipper protein 1 OS=Homo sapiens GN=LUZP1 PE=1 SV=2                                           | 4  | 1  |
| Leucine-rich repeat-containing protein 47 OS=Homo sapiens GN=LRR47 PE=1 SV=1                          | 12 | 1  |
| Leucine-rich repeat-containing protein 8D OS=Homo sapiens GN=LRR8D PE=1 SV=1                          | 11 | 5  |
| Ligatin OS=Homo sapiens GN=LGTN PE=1 SV=3                                                             | 2  | 0  |
| Low molecular weight phosphotyrosine protein phosphatase OS=Homo sapiens GN=ACP1 PE=1 SV=3            | 3  | 0  |
| Metastasis-associated protein MTA1 OS=Homo sapiens GN=MTA1 PE=1 SV=2                                  | 13 | 6  |
| Microtubule-associated protein 1S OS=Homo sapiens GN=MAP1S PE=1 SV=2                                  | 14 | 7  |
| Microtubule-associated protein 4 OS=Homo sapiens GN=MAP4 PE=1 SV=3                                    | 28 | 14 |
| MORC family CW-type zinc finger protein 2 OS=Homo sapiens GN=MORC2 PE=1 SV=2                          | 6  | 1  |
| mRNA-capping enzyme OS=Homo sapiens GN=RNMT PE=1 SV=1                                                 | 3  | 0  |
| Multifunctional protein ADE2 OS=Homo sapiens GN=PAICS PE=1 SV=3                                       | 3  | 0  |
| Myelin expression factor 2 OS=Homo sapiens GN=MYEF2 PE=1 SV=3                                         | 6  | 0  |
| Myosin-IXb OS=Homo sapiens GN=MYO9B PE=1 SV=2                                                         | 8  | 1  |
| NADH dehydrogenase [ubiquinone] iron-sulfur protein 5 OS=Homo sapiens GN=NDUFS5 PE=1 SV=3             | 2  | 1  |
| Nesprin-2 OS=Homo sapiens GN=SYNE2 PE=1 SV=3                                                          | 10 | 4  |
| Neuroguidin OS=Homo sapiens GN=NGDN PE=1 SV=1                                                         | 3  | 1  |
| Non-receptor tyrosine-protein kinase TYK2 OS=Homo sapiens GN=TYK2 PE=1 SV=3                           | 2  | 0  |
| Nostrin OS=Homo sapiens GN=NOSTRIN PE=1 SV=1                                                          | 7  | 2  |
| Nuclear pore complex protein Nup93 OS=Homo sapiens GN=NUP93 PE=1 SV=2                                 | 5  | 1  |
| Nucleolar GTP-binding protein 1 OS=Homo sapiens GN=GTPBP4 PE=1 SV=3                                   | 18 | 9  |
| Nucleoside diphosphate-linked moiety X motif 13 OS=Homo sapiens GN=NUDT13 PE=2 SV=3                   | 3  | 1  |
| Nucleosome assembly protein 1-like 1 OS=Homo sapiens GN=NAP1L1 PE=1 SV=1                              | 8  | 1  |
| Paired amphipathic helix protein Sin3a OS=Homo sapiens GN=SIN3A PE=1 SV=2                             | 4  | 0  |
| Paraspeckle component 1 OS=Homo sapiens GN=PSPC1 PE=1 SV=1                                            | 3  | 0  |
| Paxillin OS=Homo sapiens GN=PXN PE=1 SV=2                                                             | 2  | 0  |
| PDZ and LIM domain protein 5 OS=Homo sapiens GN=PDLIM5 PE=1 SV=4                                      | 3  | 0  |
| Peptidyl-prolyl cis-trans isomerase H OS=Homo sapiens GN=PPIH PE=1 SV=1                               | 2  | 0  |
| Plastin-2 OS=Homo sapiens GN=LCP1 PE=1 SV=5                                                           | 10 | 2  |
| Poly [ADP-ribose] polymerase 9 OS=Homo sapiens GN=PARP9 PE=1 SV=2                                     | 3  | 1  |
| Polymerase I and transcript release factor OS=Homo sapiens GN=PTRF PE=1 SV=1                          | 5  | 1  |
| Pre-mRNA-processing-splicing factor 8 OS=Homo sapiens GN=PRPF8 PE=1 SV=2                              | 28 | 3  |
| Probable ATP-dependent RNA helicase DDX27 OS=Homo sapiens GN=DDX27 PE=1 SV=2                          | 8  | 0  |
| Probable ATP-dependent RNA helicase DDX47 OS=Homo sapiens GN=DDX47 PE=1 SV=1                          | 2  | 0  |
| Probable ATP-dependent RNA helicase DDX5 OS=Homo sapiens GN=DDX5 PE=1 SV=1                            | 25 | 6  |
| Probable ATP-dependent RNA helicase DHX36 OS=Homo sapiens GN=DHX36 PE=1 SV=1                          | 4  | 1  |
| Programmed cell death protein 2-like OS=Homo sapiens GN=PDCD2L PE=1 SV=1                              | 2  | 1  |
| Proline-, glutamic acid- and leucine-rich protein 1 OS=Homo sapiens GN=PELP1 PE=1 SV=2                | 3  | 1  |
| Proteasome subunit alpha type-7 OS=Homo sapiens GN=PSMA7 PE=1 SV=1                                    | 4  | 1  |
| Protein BUD31 homolog OS=Homo sapiens GN=BUD31 PE=1 SV=2                                              | 5  | 2  |

|                                                                                                             |    |    |
|-------------------------------------------------------------------------------------------------------------|----|----|
| Protein diaphanous homolog 1 OS=Homo sapiens GN=DIAPH1 PE=1 SV=2                                            | 3  | 0  |
| Protein disulfide-isomerase A6 OS=Homo sapiens GN=PDIA6 PE=1 SV=1                                           | 4  | 0  |
| Protein lin-28 homolog B OS=Homo sapiens GN=LIN28B PE=1 SV=1                                                | 4  | 0  |
| Protein RRP5 homolog OS=Homo sapiens GN=PCDC11 PE=1 SV=3                                                    | 9  | 1  |
| Protein S100-A8 OS=Homo sapiens GN=S100A8 PE=1 SV=1                                                         | 3  | 1  |
| Protein S100-A9 OS=Homo sapiens GN=S100A9 PE=1 SV=1                                                         | 5  | 0  |
| Protein transport protein Sec24C OS=Homo sapiens GN=SEC24C PE=1 SV=3                                        | 8  | 3  |
| Pumilio domain-containing protein KIAA0020 OS=Homo sapiens GN=KIAA0020 PE=1 SV=3                            | 4  | 1  |
| Putative deoxyribonuclease TATDN2 OS=Homo sapiens GN=TATDN2 PE=1 SV=2                                       | 9  | 3  |
| Ras-related protein Rab-22A OS=Homo sapiens GN=RAB22A PE=1 SV=2                                             | 3  | 0  |
| Ras-related protein Rab-6A OS=Homo sapiens GN=RAB6A PE=1 SV=3                                               | 2  | 0  |
| Ras-related protein Ral-A OS=Homo sapiens GN=RALA PE=1 SV=1                                                 | 3  | 0  |
| Replication factor C subunit 1 OS=Homo sapiens GN=RFC1 PE=1 SV=4                                            | 7  | 3  |
| Reticulocalbin-2 OS=Homo sapiens GN=RCN2 PE=1 SV=1                                                          | 2  | 0  |
| Retinoblastoma-binding protein 5 OS=Homo sapiens GN=RBBP5 PE=1 SV=2                                         | 4  | 0  |
| Rho guanine nucleotide exchange factor 1 OS=Homo sapiens GN=ARHGEF1 PE=1 SV=2                               | 3  | 1  |
| Rho guanine nucleotide exchange factor 2 OS=Homo sapiens GN=ARHGEF2 PE=1 SV=4                               | 43 | 17 |
| Ribosomal protein S6 kinase alpha-3 OS=Homo sapiens GN=RPS6KA3 PE=1 SV=1                                    | 2  | 0  |
| Ribosomal RNA processing protein 1 homolog B OS=Homo sapiens GN=RRP1B PE=1 SV=3                             | 9  | 3  |
| Ribosome biogenesis protein BOP1 OS=Homo sapiens GN=BOP1 PE=1 SV=2                                          | 7  | 1  |
| Ribosome-binding protein 1 OS=Homo sapiens GN=RRBP1 PE=1 SV=4                                               | 15 | 4  |
| RNA-binding protein 27 OS=Homo sapiens GN=RBM27 PE=1 SV=2                                                   | 9  | 1  |
| RRP12-like protein OS=Homo sapiens GN=RRP12 PE=1 SV=2                                                       | 11 | 0  |
| SAGA-associated factor 29 homolog OS=Homo sapiens GN=CCDC101 PE=1 SV=1                                      | 2  | 1  |
| SEC23-interacting protein OS=Homo sapiens GN=SEC23IP PE=1 SV=1                                              | 4  | 0  |
| Selenocysteine-specific elongation factor OS=Homo sapiens GN=EEFSEC PE=1 SV=4                               | 3  | 1  |
| Semaphorin-7A OS=Homo sapiens GN=SEMA7A PE=1 SV=1                                                           | 6  | 1  |
| Serine/threonine-protein kinase MRCK beta OS=Homo sapiens GN=CDC42BPB PE=1 SV=2                             | 11 | 0  |
| Serine/threonine-protein kinase PRP4 homolog OS=Homo sapiens GN=PRPF4B PE=1 SV=2                            | 5  | 1  |
| Serine/threonine-protein phosphatase 2A catalytic subunit alpha isoform OS=Homo sapiens GN=PPP2CA PE=1 SV=1 | 3  | 1  |
| Serum deprivation-response protein OS=Homo sapiens GN=SDPR PE=1 SV=3                                        | 3  | 0  |
| Signal-induced proliferation-associated protein 1 OS=Homo sapiens GN=SIPA1 PE=1 SV=1                        | 4  | 0  |
| Sister chromatid cohesion protein PDS5 homolog B OS=Homo sapiens GN=PDS5B PE=1 SV=1                         | 8  | 2  |
| SNW domain-containing protein 1 OS=Homo sapiens GN=SNW1 PE=1 SV=1                                           | 7  | 3  |
| Sorting nexin-33 OS=Homo sapiens GN=SNX33 PE=1 SV=1                                                         | 10 | 3  |
| Spectrin alpha chain, brain OS=Homo sapiens GN=SPTAN1 PE=1 SV=3                                             | 8  | 1  |
| Spliceosome RNA helicase BAT1 OS=Homo sapiens GN=BAT1 PE=1 SV=1                                             | 8  | 3  |
| Splicing factor 1 OS=Homo sapiens GN=SF1 PE=1 SV=4                                                          | 6  | 2  |
| Splicing factor 3A subunit 3 OS=Homo sapiens GN=SF3A3 PE=1 SV=1                                             | 3  | 1  |
| Splicing factor U2AF 65 kDa subunit OS=Homo sapiens GN=U2AF2 PE=1 SV=4                                      | 7  | 1  |
| Splicing factor, arginine/serine-rich 15 OS=Homo sapiens GN=SF3B1 PE=1 SV=3                                 | 3  | 1  |
| Splicing factor, proline- and glutamine-rich OS=Homo sapiens GN=SFPQ PE=1 SV=2                              | 62 | 31 |
| Stress-induced-phosphoprotein 1 OS=Homo sapiens GN=STIP1 PE=1 SV=1                                          | 2  | 0  |
| Structural maintenance of chromosomes protein 6 OS=Homo sapiens GN=SMC6 PE=1 SV=2                           | 7  | 1  |
| SUMO-activating enzyme subunit 2 OS=Homo sapiens GN=UBA2 PE=1 SV=2                                          | 2  | 0  |
| Symplekin OS=Homo sapiens GN=SYMPK PE=1 SV=2                                                                | 2  | 1  |
| T-complex protein 1 subunit beta OS=Homo sapiens GN=CCT2 PE=1 SV=4                                          | 4  | 2  |
| Transcription initiation factor TFIID subunit 6 OS=Homo sapiens GN=TAF6 PE=1 SV=1                           | 3  | 1  |
| Transcriptional repressor protein YY1 OS=Homo sapiens GN=YY1 PE=1 SV=2                                      | 2  | 0  |
| Transgelin-2 OS=Homo sapiens GN=TAGLN2 PE=1 SV=3                                                            | 2  | 0  |
| Transketolase OS=Homo sapiens GN=TKT PE=1 SV=3                                                              | 2  | 0  |
| Translation initiation factor eIF-2B subunit beta OS=Homo sapiens GN=EIF2B2 PE=1 SV=3                       | 2  | 1  |
| Transmembrane and coiled-coil domains protein 1 OS=Homo sapiens GN=TMCC1 PE=1 SV=2                          | 9  | 2  |
| Tubulin alpha-1C chain OS=Homo sapiens GN=TUBA1C PE=1 SV=1                                                  | 7  | 2  |
| Tubulin--tyrosine ligase-like protein 12 OS=Homo sapiens GN=TTL12 PE=1 SV=2                                 | 2  | 1  |
| Tumor suppressor candidate 3 OS=Homo sapiens GN=TUSC3 PE=2 SV=1                                             | 3  | 1  |
| Tyrosine-protein kinase Tec OS=Homo sapiens GN=TEC PE=1 SV=2                                                | 7  | 0  |
| U4/U6.U5 tri-snRNP-associated protein 2 OS=Homo sapiens GN=USP39 PE=1 SV=2                                  | 10 | 1  |
| U5 small nuclear ribonucleoprotein 40 kDa protein OS=Homo sapiens GN=SNRNP40 PE=1 SV=1                      | 2  | 1  |
| U6 snRNA-associated Sm-like protein LSM4 OS=Homo sapiens GN=LSM4 PE=1 SV=1                                  | 2  | 1  |
| Ubiquitin carboxyl-terminal hydrolase 33 OS=Homo sapiens GN=USP33 PE=1 SV=2                                 | 6  | 0  |

|                                                                                               |    |   |
|-----------------------------------------------------------------------------------------------|----|---|
| Ubiquitin-associated and SH3 domain-containing protein B OS=Homo sapiens GN=UBASH3B PE=1 SV=2 | 4  | 0 |
| Ubiquitin-conjugating enzyme E2 L3 OS=Homo sapiens GN=UBE2L3 PE=1 SV=1                        | 2  | 1 |
| Ubiquitin-conjugating enzyme E2 variant 2 OS=Homo sapiens GN=UBE2V2 PE=1 SV=4                 | 3  | 1 |
| UBX domain-containing protein 7 OS=Homo sapiens GN=UBXN7 PE=1 SV=2                            | 3  | 0 |
| Vinculin OS=Homo sapiens GN=VCL PE=1 SV=4                                                     | 5  | 0 |
| Wings apart-like protein homolog OS=Homo sapiens GN=WAPAL PE=1 SV=1                           | 13 | 3 |
| YTH domain family protein 2 OS=Homo sapiens GN=YTHDF2 PE=1 SV=2                               | 4  | 1 |
| Zinc finger CCCH domain-containing protein 11A OS=Homo sapiens GN=ZC3H11A PE=1 SV=3           | 4  | 1 |
| Zinc finger protein 318 OS=Homo sapiens GN=ZNF318 PE=1 SV=2                                   | 10 | 2 |
| Zinc finger protein 512B OS=Homo sapiens GN=ZNF512B PE=1 SV=1                                 | 2  | 0 |
| Zinc finger protein 768 OS=Homo sapiens GN=ZNF768 PE=1 SV=2                                   | 2  | 0 |
| Zinc finger protein 837 OS=Homo sapiens GN=ZNF837 PE=2 SV=2                                   | 2  | 0 |
