# Supplementary material
Source: PubMed Central journal article supplement (PMC5332301)
Supplement: NIHMS816937-supplement-2.pdf [file NIHMS816937-supplement-2.pdf]

**Supplemental Figure S1B.**  
**Proteins identified in the TF-1 Screen Alone**

|                                                                                                      | TF1:ITD<br># of<br>peptides | TF1<br># of<br>peptides |
|------------------------------------------------------------------------------------------------------|-----------------------------|-------------------------|
| 14-3-3 protein gamma OS=Homo sapiens GN=YWHAG PE=1 SV=2                                              | 8                           | 4                       |
| 1-phosphatidylinositol-4,5-bisphosphate phosphodiesterase gamma-2 OS=Homo sapiens GN=PLCG2 PE=1 SV=4 | 4                           | 0                       |
| 26S protease regulatory subunit 6A OS=Homo sapiens GN=PSMC3 PE=1 SV=3                                | 3                           | 0                       |
| 40S ribosomal protein S11 OS=Homo sapiens GN=RPS11 PE=1 SV=3                                         | 13                          | 3                       |
| 40S ribosomal protein S12 OS=Homo sapiens GN=RPS12 PE=1 SV=3                                         | 20                          | 7                       |
| 40S ribosomal protein S13 OS=Homo sapiens GN=RPS13 PE=1 SV=2                                         | 10                          | 4                       |
| 40S ribosomal protein S14 OS=Homo sapiens GN=RPS14 PE=1 SV=3                                         | 24                          | 6                       |
| 40S ribosomal protein S15 OS=Homo sapiens GN=RPS15 PE=1 SV=2                                         | 13                          | 1                       |
| 40S ribosomal protein S16 OS=Homo sapiens GN=RPS16 PE=1 SV=2                                         | 38                          | 10                      |
| 40S ribosomal protein S17 OS=Homo sapiens GN=RPS17 PE=1 SV=2                                         | 13                          | 0                       |
| 40S ribosomal protein S18 OS=Homo sapiens GN=RPS18 PE=1 SV=3                                         | 16                          | 3                       |
| 40S ribosomal protein S19 OS=Homo sapiens GN=RPS19 PE=1 SV=2                                         | 18                          | 9                       |
| 40S ribosomal protein S2 OS=Homo sapiens GN=RPS2 PE=1 SV=2                                           | 35                          | 4                       |
| 40S ribosomal protein S20 OS=Homo sapiens GN=RPS20 PE=1 SV=1                                         | 16                          | 3                       |
| 40S ribosomal protein S21 OS=Homo sapiens GN=RPS21 PE=1 SV=1                                         | 4                           | 0                       |
| 40S ribosomal protein S23 OS=Homo sapiens GN=RPS23 PE=1 SV=3                                         | 7                           | 0                       |
| 40S ribosomal protein S24 OS=Homo sapiens GN=RPS24 PE=1 SV=1                                         | 24                          | 7                       |
| 40S ribosomal protein S29 OS=Homo sapiens GN=RPS29 PE=1 SV=2                                         | 9                           | 3                       |
| 40S ribosomal protein S3 OS=Homo sapiens GN=RPS3 PE=1 SV=2                                           | 129                         | 16                      |
| 40S ribosomal protein S3a OS=Homo sapiens GN=RPS3A PE=1 SV=2                                         | 43                          | 9                       |
| 40S ribosomal protein S4, X isoform OS=Homo sapiens GN=RPS4X PE=1 SV=2                               | 54                          | 8                       |
| 40S ribosomal protein S5 OS=Homo sapiens GN=RPS5 PE=1 SV=4                                           | 16                          | 1                       |
| 40S ribosomal protein S7 OS=Homo sapiens GN=RPS7 PE=1 SV=1                                           | 20                          | 3                       |
| 40S ribosomal protein S8 OS=Homo sapiens GN=RPS8 PE=1 SV=2                                           | 62                          | 18                      |
| 40S ribosomal protein S9 OS=Homo sapiens GN=RPS9 PE=1 SV=3                                           | 22                          | 5                       |
| 4F2 cell-surface antigen heavy chain OS=Homo sapiens GN=SLC3A2 PE=1 SV=3                             | 4                           | 0                       |
| 52 kDa Ro protein OS=Homo sapiens GN=TRIM21 PE=1 SV=1                                                | 42                          | 17                      |
| 60S acidic ribosomal protein P0 OS=Homo sapiens GN=RPLP0 PE=1 SV=1                                   | 47                          | 17                      |
| 60S acidic ribosomal protein P1 OS=Homo sapiens GN=RPLP1 PE=1 SV=1                                   | 6                           | 0                       |
| 60S ribosomal protein L10 OS=Homo sapiens GN=RPL10 PE=1 SV=4                                         | 21                          | 10                      |
| 60S ribosomal protein L10a OS=Homo sapiens GN=RPL10A PE=1 SV=2                                       | 20                          | 7                       |
| 60S ribosomal protein L11 OS=Homo sapiens GN=RPL11 PE=1 SV=2                                         | 17                          | 3                       |
| 60S ribosomal protein L12 OS=Homo sapiens GN=RPL12 PE=1 SV=1                                         | 43                          | 8                       |
| 60S ribosomal protein L13 OS=Homo sapiens GN=RPL13 PE=1 SV=4                                         | 12                          | 2                       |
| 60S ribosomal protein L13a OS=Homo sapiens GN=RPL13A PE=1 SV=2                                       | 26                          | 1                       |
| 60S ribosomal protein L14 OS=Homo sapiens GN=RPL14 PE=1 SV=4                                         | 34                          | 2                       |
| 60S ribosomal protein L15 OS=Homo sapiens GN=RPL15 PE=1 SV=2                                         | 26                          | 6                       |
| 60S ribosomal protein L17 OS=Homo sapiens GN=RPL17 PE=1 SV=3                                         | 17                          | 1                       |
| 60S ribosomal protein L18 OS=Homo sapiens GN=RPL18 PE=1 SV=2                                         | 54                          | 8                       |
| 60S ribosomal protein L18a OS=Homo sapiens GN=RPL18A PE=1 SV=2                                       | 15                          | 3                       |
| 60S ribosomal protein L21 OS=Homo sapiens GN=RPL21 PE=1 SV=2                                         | 16                          | 0                       |
| 60S ribosomal protein L22 OS=Homo sapiens GN=RPL22 PE=1 SV=2                                         | 14                          | 6                       |
| 60S ribosomal protein L23 OS=Homo sapiens GN=RPL23 PE=1 SV=1                                         | 12                          | 3                       |
| 60S ribosomal protein L23a OS=Homo sapiens GN=RPL23A PE=1 SV=1                                       | 27                          | 3                       |
| 60S ribosomal protein L26 OS=Homo sapiens GN=RPL26 PE=1 SV=1                                         | 7                           | 0                       |
| 60S ribosomal protein L27 OS=Homo sapiens GN=RPL27 PE=1 SV=2                                         | 19                          | 6                       |
| 60S ribosomal protein L27a OS=Homo sapiens GN=RPL27A PE=1 SV=2                                       | 11                          | 5                       |
| 60S ribosomal protein L28 OS=Homo sapiens GN=RPL28 PE=1 SV=3                                         | 16                          | 1                       |
| 60S ribosomal protein L3 OS=Homo sapiens GN=RPL3 PE=1 SV=2                                           | 45                          | 0                       |
| 60S ribosomal protein L30 OS=Homo sapiens GN=RPL30 PE=1 SV=2                                         | 43                          | 8                       |
| 60S ribosomal protein L31 OS=Homo sapiens GN=RPL31 PE=1 SV=1                                         | 6                           | 0                       |
| 60S ribosomal protein L32 OS=Homo sapiens GN=RPL32 PE=1 SV=2                                         | 10                          | 1                       |
| 60S ribosomal protein L34 OS=Homo sapiens GN=RPL34 PE=1 SV=3                                         | 6                           | 0                       |
| 60S ribosomal protein L35 OS=Homo sapiens GN=RPL35 PE=1 SV=2                                         | 8                           | 3                       |
| 60S ribosomal protein L35a OS=Homo sapiens GN=RPL35A PE=1 SV=2                                       | 10                          | 3                       |
| 60S ribosomal protein L36 OS=Homo sapiens GN=RPL36 PE=1 SV=3                                         | 9                           | 3                       |
| 60S ribosomal protein L37a OS=Homo sapiens GN=RPL37A PE=1 SV=2                                       | 6                           | 0                       |
| 60S ribosomal protein L38 OS=Homo sapiens GN=RPL38 PE=1 SV=2                                         | 12                          | 1                       |
| 60S ribosomal protein L5 OS=Homo sapiens GN=RPL5 PE=1 SV=3                                           | 20                          | 2                       |
| 60S ribosomal protein L6 OS=Homo sapiens GN=RPL6 PE=1 SV=3                                           | 27                          | 3                       |
| 60S ribosomal protein L7 OS=Homo sapiens GN=RPL7 PE=1 SV=1                                           | 39                          | 6                       |

|                                                                                               |     |    |
|-----------------------------------------------------------------------------------------------|-----|----|
| 60S ribosomal protein L7a OS=Homo sapiens GN=RPL7A PE=1 SV=2                                  | 40  | 5  |
| 60S ribosomal protein L8 OS=Homo sapiens GN=RPL8 PE=1 SV=2                                    | 27  | 0  |
| 60S ribosomal protein L9 OS=Homo sapiens GN=RPL9 PE=1 SV=1                                    | 20  | 1  |
| Actin-like protein 6A OS=Homo sapiens GN=ACTL6A PE=1 SV=1                                     | 6   | 1  |
| Actin-related protein 2/3 complex subunit 2 OS=Homo sapiens GN=ARPC2 PE=1 SV=1                | 6   | 1  |
| Actin-related protein 2/3 complex subunit 3 OS=Homo sapiens GN=ARPC3 PE=1 SV=3                | 2   | 0  |
| Actin-related protein 2/3 complex subunit 4 OS=Homo sapiens GN=ARPC4 PE=1 SV=3                | 4   | 2  |
| Activated RNA polymerase II transcriptional coactivator p15 OS=Homo sapiens GN=SUB1 PE=1 SV=3 | 9   | 3  |
| Activating signal cointegrator 1 complex subunit 3 OS=Homo sapiens GN=ASCC3 PE=1 SV=3         | 8   | 0  |
| ADP/ATP translocase 2 OS=Homo sapiens GN=SLC25A5 PE=1 SV=6                                    | 128 | 3  |
| ADP/ATP translocase 3 OS=Homo sapiens GN=SLC25A6 PE=1 SV=4                                    | 21  | 0  |
| ADP-ribosylation factor 3 OS=Homo sapiens GN=ARF3 PE=1 SV=2                                   | 6   | 0  |
| ADP-ribosylation factor 4 OS=Homo sapiens GN=ARF4 PE=1 SV=3                                   | 3   | 0  |
| ADP-sugar pyrophosphatase OS=Homo sapiens GN=NUDT5 PE=1 SV=1                                  | 75  | 0  |
| Alanyl-tRNA synthetase, cytoplasmic OS=Homo sapiens GN=AARS PE=1 SV=2                         | 4   | 1  |
| Alpha-enolase OS=Homo sapiens GN=ENO1 PE=1 SV=2                                               | 2   | 1  |
| Amidophosphoribosyltransferase OS=Homo sapiens GN=PPAT PE=1 SV=1                              | 110 | 0  |
| Anaphase-promoting complex subunit 5 OS=Homo sapiens GN=ANAPC5 PE=1 SV=2                      | 4   | 2  |
| AP-2 complex subunit alpha-1 OS=Homo sapiens GN=AP2A1 PE=1 SV=3                               | 5   | 1  |
| AP-2 complex subunit beta OS=Homo sapiens GN=AP2B1 PE=1 SV=1                                  | 4   | 1  |
| AP-3 complex subunit sigma-1 OS=Homo sapiens GN=AP3S1 PE=1 SV=1                               | 2   | 0  |
| Asparaginyl-tRNA synthetase, cytoplasmic OS=Homo sapiens GN=NARS PE=1 SV=1                    | 24  | 12 |
| Aspartyl-tRNA synthetase, cytoplasmic OS=Homo sapiens GN=DARS PE=1 SV=2                       | 52  | 3  |
| Ataxin-10 OS=Homo sapiens GN=ATXN10 PE=1 SV=1                                                 | 2   | 0  |
| ATP-binding cassette sub-family F member 2 OS=Homo sapiens GN=ABCF2 PE=1 SV=2                 | 6   | 2  |
| ATP-dependent DNA helicase Q1 OS=Homo sapiens GN=RECQL PE=1 SV=3                              | 9   | 1  |
| ATP-dependent metalloprotease YME1L1 OS=Homo sapiens GN=YME1L1 PE=1 SV=2                      | 9   | 0  |
| ATP-dependent RNA helicase A OS=Homo sapiens GN=DHX9 PE=1 SV=4                                | 43  | 17 |
| ATP-dependent RNA helicase DDX1 OS=Homo sapiens GN=DDX1 PE=1 SV=2                             | 4   | 1  |
| ATP-dependent RNA helicase DDX39 OS=Homo sapiens GN=DDX39 PE=1 SV=2                           | 5   | 0  |
| ATP-dependent RNA helicase DDX3X OS=Homo sapiens GN=DDX3X PE=1 SV=3                           | 12  | 6  |
| ATP-dependent RNA helicase DDX50 OS=Homo sapiens GN=DDX50 PE=1 SV=1                           | 3   | 1  |
| BAG family molecular chaperone regulator 2 OS=Homo sapiens GN=BAG2 PE=1 SV=1                  | 14  | 1  |
| Bifunctional aminoacyl-tRNA synthetase OS=Homo sapiens GN=EPRS PE=1 SV=5                      | 78  | 22 |
| Bifunctional protein NCOAT OS=Homo sapiens GN=MGEA5 PE=1 SV=2                                 | 5   | 1  |
| C-1-tetrahydrofolate synthase, cytoplasmic OS=Homo sapiens GN=MTHFD1 PE=1 SV=3                | 111 | 6  |
| Cathepsin G OS=Homo sapiens GN=CTSG PE=1 SV=2                                                 | 5   | 0  |
| Cation-independent mannose-6-phosphate receptor OS=Homo sapiens GN=IGF2R PE=1 SV=2            | 15  | 0  |
| CDK5 regulatory subunit-associated protein 1-like 1 OS=Homo sapiens GN=CDKAL1 PE=1 SV=1       | 2   | 0  |
| Cell differentiation protein RCD1 homolog OS=Homo sapiens GN=RQCD1 PE=1 SV=1                  | 2   | 0  |
| Cell growth-regulating nucleolar protein OS=Homo sapiens GN=LYAR PE=1 SV=2                    | 2   | 0  |
| Cellular nucleic acid-binding protein OS=Homo sapiens GN=CNBP PE=1 SV=1                       | 2   | 0  |
| Centrosomal protein of 120 kDa OS=Homo sapiens GN=CEP120 PE=2 SV=2                            | 4   | 0  |
| Checkpoint protein HUS1B OS=Homo sapiens GN=HUS1B PE=1 SV=1                                   | 2   | 0  |
| Clathrin heavy chain 1 OS=Homo sapiens GN=CLTC PE=1 SV=5                                      | 139 | 1  |
| Coatomer subunit beta' OS=Homo sapiens GN=COPB2 PE=1 SV=2                                     | 8   | 1  |
| Cofilin-1 OS=Homo sapiens GN=CFL1 PE=1 SV=3                                                   | 10  | 4  |
| Cold-inducible RNA-binding protein OS=Homo sapiens GN=CIRBP PE=1 SV=1                         | 4   | 0  |
| Constitutive coactivator of PPAR-gamma-like protein 1 OS=Homo sapiens GN=FAM120A PE=1 SV=2    | 4   | 0  |
| Coronin-1A OS=Homo sapiens GN=CORO1A PE=1 SV=4                                                | 31  | 6  |
| C-terminal-binding protein 2 OS=Homo sapiens GN=CTBP2 PE=1 SV=1                               | 2   | 0  |
| Cullin-associated NEDD8-dissociated protein 1 OS=Homo sapiens GN=CAND1 PE=1 SV=2              | 5   | 0  |
| Cutaneous T-cell lymphoma-associated antigen 5 OS=Homo sapiens GN=CTAGE5 PE=1 SV=3            | 8   | 0  |
| Cyclin-G-associated kinase OS=Homo sapiens GN=GAK PE=1 SV=2                                   | 4   | 0  |
| Cysteine and glycine-rich protein 1 OS=Homo sapiens GN=CSR1 PE=1 SV=3                         | 3   | 1  |
| Cytochrome c oxidase subunit 2 OS=Homo sapiens GN=MT-CO2 PE=1 SV=1                            | 9   | 0  |
| Cytochrome c oxidase subunit 6B1 OS=Homo sapiens GN=COX6B1 PE=1 SV=2                          | 8   | 0  |
| Cytochrome c oxidase subunit 6C OS=Homo sapiens GN=COX6C PE=1 SV=2                            | 5   | 0  |
| Cytoplasmic FMR1-interacting protein 1 OS=Homo sapiens GN=CYFIP1 PE=1 SV=1                    | 7   | 1  |
| D-3-phosphoglycerate dehydrogenase OS=Homo sapiens GN=PHGDH PE=1 SV=4                         | 11  | 3  |
| Disco-interacting protein 2 homolog B OS=Homo sapiens GN=DIP2B PE=1 SV=3                      | 9   | 1  |
| DNA (cytosine-5)-methyltransferase 1 OS=Homo sapiens GN=DNMT1 PE=1 SV=2                       | 7   | 0  |
| DNA polymerase delta catalytic subunit OS=Homo sapiens GN=POLD1 PE=1 SV=2                     | 5   | 0  |
| DNA polymerase delta subunit 3 OS=Homo sapiens GN=POLD3 PE=1 SV=2                             | 3   | 0  |
| DNA replication licensing factor MCM3 OS=Homo sapiens GN=MCM3 PE=1 SV=3                       | 26  | 6  |

|                                                                                                                  |     |    |
|------------------------------------------------------------------------------------------------------------------|-----|----|
| DNA replication licensing factor MCM5 OS=Homo sapiens GN=MCM5 PE=1 SV=5                                          | 9   | 3  |
| DNA replication licensing factor MCM6 OS=Homo sapiens GN=MCM6 PE=1 SV=1                                          | 2   | 1  |
| DNA topoisomerase 1 OS=Homo sapiens GN=TOP1 PE=1 SV=2                                                            | 18  | 6  |
| DNA topoisomerase 2-alpha OS=Homo sapiens GN=TOP2A PE=1 SV=3                                                     | 11  | 0  |
| DNA-(apurinic or apyrimidinic site) lyase OS=Homo sapiens GN=APEX1 PE=1 SV=2                                     | 2   | 1  |
| DNA-binding protein A OS=Homo sapiens GN=CSDA PE=1 SV=4                                                          | 4   | 0  |
| DNA-binding protein Ikaros OS=Homo sapiens GN=IKZF1 PE=1 SV=1                                                    | 7   | 1  |
| DNA-dependent protein kinase catalytic subunit OS=Homo sapiens GN=PRKDC PE=1 SV=3                                | 84  | 21 |
| DNA-directed RNA polymerase II subunit RPB2 OS=Homo sapiens GN=POLR2B PE=1 SV=1                                  | 2   | 1  |
| DnaJ homolog subfamily B member 11 OS=Homo sapiens GN=DNAJB11 PE=1 SV=1                                          | 4   | 0  |
| DnaJ homolog subfamily B member 12 OS=Homo sapiens GN=DNAJB12 PE=1 SV=4                                          | 5   | 0  |
| DnaJ homolog subfamily C member 7 OS=Homo sapiens GN=DNAJC7 PE=1 SV=2                                            | 6   | 1  |
| Dolichol-phosphate mannosyltransferase OS=Homo sapiens GN=DPM1 PE=1 SV=1                                         | 3   | 0  |
| Dolichyl-diphosphooligosaccharide--protein glycosyltransferase 48 kDa subunit OS=Homo sapiens GN=DDOST PE=1 SV=4 | 3   | 0  |
| Dolichyl-diphosphooligosaccharide--protein glycosyltransferase subunit 2 OS=Homo sapiens GN=RPN2 PE=1 SV=3       | 8   | 0  |
| Dolichyl-diphosphooligosaccharide--protein glycosyltransferase subunit STT3A OS=Homo sapiens GN=STT3A PE=1 SV=2  | 6   | 0  |
| Double-strand-break repair protein rad21 homolog OS=Homo sapiens GN=RAD21 PE=1 SV=2                              | 4   | 0  |
| Dual specificity protein phosphatase 3 OS=Homo sapiens GN=DUSP3 PE=1 SV=1                                        | 2   | 0  |
| E3 ubiquitin-protein ligase UBR5 OS=Homo sapiens GN=UBR5 PE=1 SV=2                                               | 4   | 1  |
| Elongation factor 1-alpha 1 OS=Homo sapiens GN=EEF1A1 PE=1 SV=1                                                  | 118 | 17 |
| Elongation factor 1-gamma OS=Homo sapiens GN=EEF1G PE=1 SV=3                                                     | 2   | 1  |
| Erlin-1 OS=Homo sapiens GN=ERLIN1 PE=1 SV=1                                                                      | 6   | 0  |
| Erythrocyte band 7 integral membrane protein OS=Homo sapiens GN=STOM PE=1 SV=3                                   | 3   | 0  |
| Estradiol 17-beta-dehydrogenase 12 OS=Homo sapiens GN=HSD17B12 PE=1 SV=2                                         | 2   | 0  |
| Eukaryotic initiation factor 4A-I OS=Homo sapiens GN=EIF4A1 PE=1 SV=1                                            | 7   | 3  |
| Eukaryotic initiation factor 4A-III OS=Homo sapiens GN=EIF4A3 PE=1 SV=4                                          | 2   | 0  |
| Eukaryotic translation elongation factor 1 epsilon-1 OS=Homo sapiens GN=EEF1E1 PE=1 SV=1                         | 5   | 2  |
| Eukaryotic translation initiation factor 1A, Y-chromosomal OS=Homo sapiens GN=EIF1AY PE=1 SV=4                   | 2   | 0  |
| Eukaryotic translation initiation factor 2 subunit 1 OS=Homo sapiens GN=EIF2S1 PE=1 SV=3                         | 10  | 1  |
| Eukaryotic translation initiation factor 2 subunit 3 OS=Homo sapiens GN=EIF2S3 PE=1 SV=3                         | 3   | 0  |
| Eukaryotic translation initiation factor 3 subunit B OS=Homo sapiens GN=EIF3B PE=1 SV=3                          | 2   | 0  |
| Eukaryotic translation initiation factor 3 subunit E OS=Homo sapiens GN=EIF3E PE=1 SV=1                          | 4   | 2  |
| Eukaryotic translation initiation factor 3 subunit F OS=Homo sapiens GN=EIF3F PE=1 SV=1                          | 4   | 2  |
| Eukaryotic translation initiation factor 5A-1 OS=Homo sapiens GN=EIF5A PE=1 SV=2                                 | 4   | 0  |
| Exocyst complex component 7 OS=Homo sapiens GN=EXOC7 PE=1 SV=3                                                   | 3   | 0  |
| Exosome complex exonuclease RRP44 OS=Homo sapiens GN=DIS3 PE=1 SV=2                                              | 4   | 0  |
| Exportin-T OS=Homo sapiens GN=XPOT PE=1 SV=2                                                                     | 15  | 2  |
| Extended synaptotagmin-2 OS=Homo sapiens GN=ESYT2 PE=1 SV=1                                                      | 6   | 0  |
| F-actin-capping protein subunit alpha-2 OS=Homo sapiens GN=CAPZA2 PE=1 SV=3                                      | 2   | 1  |
| Fascin OS=Homo sapiens GN=FSCN1 PE=1 SV=3                                                                        | 10  | 2  |
| Fatty aldehyde dehydrogenase OS=Homo sapiens GN=ALDH3A2 PE=1 SV=1                                                | 9   | 0  |
| FCH and double SH3 domains protein 2 OS=Homo sapiens GN=FCHSD2 PE=1 SV=3                                         | 9   | 0  |
| Filamin-B OS=Homo sapiens GN=FLNB PE=1 SV=2                                                                      | 84  | 42 |
| Flap endonuclease 1 OS=Homo sapiens GN=FEN1 PE=1 SV=1                                                            | 3   | 0  |
| Glutaminyl-tRNA synthetase OS=Homo sapiens GN=QARS PE=1 SV=1                                                     | 18  | 3  |
| Glyceraldehyde-3-phosphate dehydrogenase OS=Homo sapiens GN=GAPDH PE=1 SV=3                                      | 6   | 2  |
| Glycogen phosphorylase, liver form OS=Homo sapiens GN=PYGL PE=1 SV=4                                             | 10  | 3  |
| Glycogenin-1 OS=Homo sapiens GN=GYG1 PE=1 SV=4                                                                   | 2   | 0  |
| Glycyl-tRNA synthetase OS=Homo sapiens GN=GARS PE=1 SV=2                                                         | 8   | 2  |
| Golgi apparatus protein 1 OS=Homo sapiens GN=GLG1 PE=1 SV=2                                                      | 2   | 1  |
| Golgin subfamily B member 1 OS=Homo sapiens GN=GOLGB1 PE=1 SV=2                                                  | 7   | 3  |
| GTP-binding nuclear protein Ran OS=Homo sapiens GN=RAN PE=1 SV=3                                                 | 3   | 1  |
| Guanine nucleotide-binding protein G(I)/G(S)/G(O) subunit gamma-5 OS=Homo sapiens GN=GNG5 PE=1 SV=3              | 5   | 0  |
| Guanine nucleotide-binding protein G(k) subunit alpha OS=Homo sapiens GN=GNAI3 PE=1 SV=3                         | 2   | 0  |
| H/ACA ribonucleoprotein complex subunit 2 OS=Homo sapiens GN=NHP2 PE=1 SV=1                                      | 3   | 1  |
| H/ACA ribonucleoprotein complex subunit 3 OS=Homo sapiens GN=NOP10 PE=1 SV=1                                     | 4   | 1  |
| Heat shock protein 105 kDa OS=Homo sapiens GN=HSPH1 PE=1 SV=1                                                    | 21  | 3  |
| Heat shock protein HSP 90-beta OS=Homo sapiens GN=HSP90AB1 PE=1 SV=4                                             | 293 | 51 |
| Hematopoietic lineage cell-specific protein OS=Homo sapiens GN=HCLS1 PE=1 SV=2                                   | 6   | 3  |
| Heterogeneous nuclear ribonucleoprotein A/B OS=Homo sapiens GN=HNRNPAB PE=1 SV=2                                 | 6   | 1  |
| Heterogeneous nuclear ribonucleoprotein A0 OS=Homo sapiens GN=HNRNPA0 PE=1 SV=1                                  | 6   | 2  |

|                                                                                                                  |     |    |
|------------------------------------------------------------------------------------------------------------------|-----|----|
| Heterogeneous nuclear ribonucleoprotein D0 OS=Homo sapiens GN=HNRNPD PE=1 SV=1                                   | 29  | 11 |
| Heterogeneous nuclear ribonucleoprotein D-like OS=Homo sapiens GN=HNRPDL PE=1 SV=3                               | 7   | 3  |
| Heterogeneous nuclear ribonucleoprotein H OS=Homo sapiens GN=HNRNPH1 PE=1 SV=4                                   | 8   | 3  |
| Heterogeneous nuclear ribonucleoprotein K OS=Homo sapiens GN=HNRNPK PE=1 SV=1                                    | 8   | 3  |
| Heterogeneous nuclear ribonucleoprotein M OS=Homo sapiens GN=HNRNPM PE=1 SV=3                                    | 15  | 5  |
| Heterogeneous nuclear ribonucleoprotein Q OS=Homo sapiens GN=SYNCRIP PE=1 SV=2                                   | 30  | 14 |
| Heterogeneous nuclear ribonucleoprotein R OS=Homo sapiens GN=HNRNPR PE=1 SV=1                                    | 9   | 1  |
| Heterogeneous nuclear ribonucleoprotein U OS=Homo sapiens GN=HNRNPU PE=1 SV=6                                    | 122 | 43 |
| Heterogeneous nuclear ribonucleoprotein U-like protein 1 OS=Homo sapiens GN=HNRNPUL1 PE=1 SV=2                   | 11  | 2  |
| Heterogeneous nuclear ribonucleoproteins C1/C2 OS=Homo sapiens GN=HNRNPC PE=1 SV=4                               | 22  | 7  |
| Hexokinase-2 OS=Homo sapiens GN=HK2 PE=1 SV=2                                                                    | 4   | 1  |
| High affinity immunoglobulin gamma Fc receptor I OS=Homo sapiens GN=FCGR1A PE=1 SV=2                             | 22  | 1  |
| High mobility group protein B1 OS=Homo sapiens GN=HMGB1 PE=1 SV=3                                                | 17  | 0  |
| Histone acetyltransferase type B catalytic subunit OS=Homo sapiens GN=HAT1 PE=1 SV=1                             | 3   | 1  |
| Histone deacetylase 1 OS=Homo sapiens GN=HDAC1 PE=1 SV=1                                                         | 2   | 1  |
| Histone H1.4 OS=Homo sapiens GN=HIST1H1E PE=1 SV=2                                                               | 44  | 2  |
| Histone H2A type 1 OS=Homo sapiens GN=HIST1H2AG PE=1 SV=2                                                        | 9   | 1  |
| Histone-binding protein RBBP4 OS=Homo sapiens GN=RBBP4 PE=1 SV=3                                                 | 2   | 1  |
| HLA class I histocompatibility antigen, A-34 alpha chain OS=Homo sapiens GN=HLA-A PE=1 SV=1                      | 21  | 4  |
| HLA class I histocompatibility antigen, Cw-12 alpha chain OS=Homo sapiens GN=HLA-C PE=1 SV=2                     | 7   | 1  |
| Huntingtin-interacting protein 1-related protein OS=Homo sapiens GN=HIP1R PE=1 SV=2                              | 62  | 1  |
| Importin subunit beta-1 OS=Homo sapiens GN=KPNB1 PE=1 SV=2                                                       | 7   | 0  |
| Inositol hexakisphosphate and diphosphoinositol-pentakisphosphate kinase 2 OS=Homo sapiens GN=PPIP5K2 PE=1 SV=3  | 7   | 1  |
| Interleukin enhancer-binding factor 2 OS=Homo sapiens GN=ILF2 PE=1 SV=2                                          | 5   | 0  |
| Isoleucyl-tRNA synthetase, cytoplasmic OS=Homo sapiens GN=IARS PE=1 SV=2                                         | 32  | 8  |
| Kelch-like ECH-associated protein 1 OS=Homo sapiens GN=KEAP1 PE=1 SV=2                                           | 35  | 1  |
| Keratin, type I cytoskeletal 9 OS=Homo sapiens GN=KRT9 PE=1 SV=3                                                 | 78  | 27 |
| Keratin, type II cytoskeletal 2 epidermal OS=Homo sapiens GN=KRT2 PE=1 SV=2                                      | 45  | 11 |
| KH domain-containing, RNA-binding, signal transduction-associated protein 1 OS=Homo sapiens GN=KHDRBS1 PE=1 SV=1 | 4   | 2  |
| Kinesin-like protein KIF14 OS=Homo sapiens GN=KIF14 PE=1 SV=1                                                    | 4   | 2  |
| Kinesin-like protein KIFC1 OS=Homo sapiens GN=KIFC1 PE=1 SV=2                                                    | 4   | 2  |
| Lamin-A/C OS=Homo sapiens GN=LMNA PE=1 SV=1                                                                      | 4   | 1  |
| La-related protein 1 OS=Homo sapiens GN=LARP1 PE=1 SV=2                                                          | 4   | 2  |
| LEM domain-containing protein 2 OS=Homo sapiens GN=LEMD2 PE=1 SV=1                                               | 2   | 0  |
| Leucine-rich repeat flightless-interacting protein 1 OS=Homo sapiens GN=LRRFIP1 PE=1 SV=2                        | 7   | 2  |
| Leucine-rich repeat-containing protein 59 OS=Homo sapiens GN=LRRCS9 PE=1 SV=1                                    | 5   | 1  |
| Leucyl-tRNA synthetase, cytoplasmic OS=Homo sapiens GN=LARS PE=1 SV=2                                            | 29  | 9  |
| Leukocyte elastase inhibitor OS=Homo sapiens GN=SERPINB1 PE=1 SV=1                                               | 2   | 0  |
| LIM and SH3 domain protein 1 OS=Homo sapiens GN=LASP1 PE=1 SV=2                                                  | 3   | 0  |
| Linker for activation of T-cells family member 2 OS=Homo sapiens GN=LAT2 PE=1 SV=1                               | 6   | 2  |
| Long-chain fatty acid transport protein 3 OS=Homo sapiens GN=SLC27A3 PE=2 SV=3                                   | 2   | 0  |
| Long-chain-fatty-acid--CoA ligase 3 OS=Homo sapiens GN=ACSL3 PE=1 SV=3                                           | 3   | 1  |
| Long-chain-fatty-acid--CoA ligase 5 OS=Homo sapiens GN=ACSL5 PE=1 SV=1                                           | 3   | 0  |
| Lymphocyte-specific protein 1 OS=Homo sapiens GN=LSP1 PE=1 SV=1                                                  | 8   | 3  |
| Lysyl-tRNA synthetase OS=Homo sapiens GN=KARS PE=1 SV=3                                                          | 43  | 18 |
| Malectin OS=Homo sapiens GN=MLEC PE=1 SV=1                                                                       | 2   | 0  |
| Mediator of DNA damage checkpoint protein 1 OS=Homo sapiens GN=MDC1 PE=1 SV=3                                    | 2   | 0  |
| Melanoma inhibitory activity protein 3 OS=Homo sapiens GN=MIA3 PE=1 SV=1                                         | 5   | 0  |
| Metastasis-associated protein MTA2 OS=Homo sapiens GN=MTA2 PE=1 SV=1                                             | 6   | 0  |
| Methionine aminopeptidase 2 OS=Homo sapiens GN=METAP2 PE=1 SV=1                                                  | 8   | 3  |
| Methionyl-tRNA synthetase, cytoplasmic OS=Homo sapiens GN=MARS PE=1 SV=2                                         | 16  | 7  |
| Microtubule-actin cross-linking factor 1, isoforms 1/2/3/5 OS=Homo sapiens GN=MACF1 PE=1 SV=3                    | 4   | 2  |
| mRNA turnover protein 4 homolog OS=Homo sapiens GN=MRTO4 PE=1 SV=2                                               | 5   | 0  |
| Myeloid leukemia factor 2 OS=Homo sapiens GN=MLF2 PE=1 SV=1                                                      | 2   | 0  |
| Myeloid-associated differentiation marker OS=Homo sapiens GN=MYADM PE=1 SV=2                                     | 6   | 0  |
| Myosin-10 OS=Homo sapiens GN=MYH10 PE=1 SV=3                                                                     | 7   | 3  |
| Myosin-14 OS=Homo sapiens GN=MYH14 PE=1 SV=1                                                                     | 14  | 5  |
| NADH dehydrogenase [ubiquinone] 1 beta subcomplex subunit 1 OS=Homo sapiens GN=NDUFB1 PE=1 SV=1                  | 2   | 0  |
| NADH dehydrogenase [ubiquinone] 1 beta subcomplex subunit 4 OS=Homo sapiens GN=NDUFB4 PE=1 SV=3                  | 2   | 1  |
| Nascent polypeptide-associated complex subunit alpha OS=Homo sapiens GN=NACA PE=1 SV=1                           | 20  | 8  |
| Nck-associated protein 1-like OS=Homo sapiens GN=NCKAP1L PE=1 SV=3                                               | 2   | 0  |

|                                                                                                             |    |    |
|-------------------------------------------------------------------------------------------------------------|----|----|
| NEDD9-interacting protein with calponin homology and LIM domains OS=Homo sapiens GN=MICAL1 PE=1 SV=2        | 9  | 3  |
| Nicotinate-nucleotide pyrophosphorylase [carboxylating] OS=Homo sapiens GN=QPRT PE=1 SV=3                   | 3  | 0  |
| Nuclear cap-binding protein subunit 1 OS=Homo sapiens GN=NCBP1 PE=1 SV=1                                    | 9  | 4  |
| Nuclear inhibitor of protein phosphatase 1 OS=Homo sapiens GN=PPP1R8 PE=1 SV=2                              | 3  | 0  |
| Nuclease-sensitive element-binding protein 1 OS=Homo sapiens GN=YBX1 PE=1 SV=3                              | 27 | 5  |
| Nucleolar RNA helicase 2 OS=Homo sapiens GN=DDX21 PE=1 SV=5                                                 | 96 | 13 |
| Peptidyl-prolyl cis-trans isomerase B OS=Homo sapiens GN=PPIB PE=1 SV=2                                     | 2  | 0  |
| Peroxiredoxin-1 OS=Homo sapiens GN=PRDX1 PE=1 SV=1                                                          | 31 | 8  |
| Peroxiredoxin-6 OS=Homo sapiens GN=PRDX6 PE=1 SV=3                                                          | 3  | 0  |
| Phosphatidylinositol 3-kinase regulatory subunit alpha OS=Homo sapiens GN=PIK3R1 PE=1 SV=2                  | 3  | 1  |
| Phosphatidylinositol-3,4,5-trisphosphate 5-phosphatase 1 OS=Homo sapiens GN=INPP5D PE=1 SV=2                | 5  | 0  |
| Phospholipase A-2-activating protein OS=Homo sapiens GN=PLAA PE=1 SV=2                                      | 2  | 0  |
| Phosphorylase b kinase regulatory subunit alpha, skeletal muscle isoform OS=Homo sapiens GN=PHKA1 PE=1 SV=2 | 7  | 1  |
| Phosphorylase b kinase regulatory subunit beta OS=Homo sapiens GN=PHKB PE=1 SV=3                            | 52 | 1  |
| Poly(rC)-binding protein 1 OS=Homo sapiens GN=PCBP1 PE=1 SV=2                                               | 5  | 1  |
| Poly(rC)-binding protein 2 OS=Homo sapiens GN=PCBP2 PE=1 SV=1                                               | 11 | 3  |
| Polypyrimidine tract-binding protein 1 OS=Homo sapiens GN=PTBP1 PE=1 SV=1                                   | 4  | 0  |
| Pre-mRNA-processing factor 40 homolog A OS=Homo sapiens GN=PRPF40A PE=1 SV=2                                | 7  | 0  |
| Probable ATP-dependent RNA helicase DDX17 OS=Homo sapiens GN=DDX17 PE=1 SV=1                                | 20 | 9  |
| Probable dimethyladenosine transferase OS=Homo sapiens GN=DIMT1L PE=1 SV=1                                  | 3  | 0  |
| Probable ribosome biogenesis protein NEP1 OS=Homo sapiens GN=EMG1 PE=1 SV=4                                 | 6  | 0  |
| Programmed cell death protein 6 OS=Homo sapiens GN=PDCD6 PE=1 SV=1                                          | 4  | 1  |
| Prohibitin OS=Homo sapiens GN=PHB PE=1 SV=1                                                                 | 6  | 0  |
| Prohibitin-2 OS=Homo sapiens GN=PHB2 PE=1 SV=2                                                              | 7  | 3  |
| Prolactin regulatory element-binding protein OS=Homo sapiens GN=PREB PE=1 SV=2                              | 5  | 0  |
| Proliferating cell nuclear antigen OS=Homo sapiens GN=PCNA PE=1 SV=1                                        | 3  | 0  |
| Proliferation-associated protein 2G4 OS=Homo sapiens GN=PA2G4 PE=1 SV=3                                     | 33 | 6  |
| Prolyl 4-hydroxylase subunit alpha-1 OS=Homo sapiens GN=P4HA1 PE=1 SV=2                                     | 2  | 0  |
| Prostaglandin E synthase 3 OS=Homo sapiens GN=PTGES3 PE=1 SV=1                                              | 3  | 0  |
| Protein DEK OS=Homo sapiens GN=DEK PE=1 SV=1                                                                | 7  | 0  |
| Protein disulfide-isomerase OS=Homo sapiens GN=P4HB PE=1 SV=3                                               | 2  | 1  |
| Protein FAM107B OS=Homo sapiens GN=FAM107B PE=1 SV=1                                                        | 4  | 1  |
| Protein FAM98B OS=Homo sapiens GN=FAM98B PE=1 SV=1                                                          | 3  | 0  |
| Protein FRG1 OS=Homo sapiens GN=FRG1 PE=1 SV=1                                                              | 3  | 0  |
| Protein kinase C-binding protein 1 OS=Homo sapiens GN=ZMYND8 PE=1 SV=2                                      | 3  | 0  |
| Protein LAS1 homolog OS=Homo sapiens GN=LAS1L PE=1 SV=2                                                     | 2  | 0  |
| Protein LYRIC OS=Homo sapiens GN=MTDH PE=1 SV=2                                                             | 5  | 1  |
| Protein pelota homolog OS=Homo sapiens GN=PELO PE=1 SV=1                                                    | 2  | 0  |
| Protein RCC2 OS=Homo sapiens GN=RCC2 PE=1 SV=2                                                              | 12 | 2  |
| Protein SEC13 homolog OS=Homo sapiens GN=SEC13 PE=1 SV=3                                                    | 4  | 1  |
| Protein SET OS=Homo sapiens GN=SET PE=1 SV=3                                                                | 4  | 0  |
| Protein transport protein Sec23B OS=Homo sapiens GN=SEC23B PE=1 SV=2                                        | 6  | 2  |
| Protein transport protein Sec61 subunit beta OS=Homo sapiens GN=SEC61B PE=1 SV=2                            | 4  | 0  |
| Protein tyrosine phosphatase-like protein PTPLAD1 OS=Homo sapiens GN=PTPLAD1 PE=1 SV=2                      | 15 | 0  |
| Proto-oncogene tyrosine-protein kinase ROS OS=Homo sapiens GN=ROS1 PE=2 SV=3                                | 12 | 0  |
| Proto-oncogene vav OS=Homo sapiens GN=VAV1 PE=1 SV=4                                                        | 10 | 1  |
| Putative ATP-dependent RNA helicase DHX33 OS=Homo sapiens GN=DHX33 PE=1 SV=2                                | 4  | 1  |
| Putative helicase MOV-10 OS=Homo sapiens GN=MOV10 PE=1 SV=2                                                 | 3  | 0  |
| Putative neutrophil cytosol factor 1B OS=Homo sapiens GN=NCF1B PE=5 SV=2                                    | 3  | 0  |
| Putative oxidoreductase GLYR1 OS=Homo sapiens GN=GLYR1 PE=1 SV=3                                            | 2  | 1  |
| Putative rRNA methyltransferase 3 OS=Homo sapiens GN=FTSJ3 PE=1 SV=2                                        | 2  | 0  |
| Putative tropomyosin alpha-3 chain-like protein OS=Homo sapiens PE=5 SV=2                                   | 11 | 4  |
| Rab GTPase-binding effector protein 2 OS=Homo sapiens GN=RABEP2 PE=1 SV=2                                   | 9  | 0  |
| Rab5 GDP/GTP exchange factor OS=Homo sapiens GN=RABGEF1 PE=1 SV=2                                           | 2  | 0  |
| Raftlin OS=Homo sapiens GN=RFTN1 PE=1 SV=4                                                                  | 2  | 0  |
| Ras-related C3 botulinum toxin substrate 2 OS=Homo sapiens GN=RAC2 PE=1 SV=1                                | 5  | 1  |
| Ras-related protein Rab-11A OS=Homo sapiens GN=RAB11A PE=1 SV=3                                             | 3  | 0  |
| Ras-related protein Rab-14 OS=Homo sapiens GN=RAB14 PE=1 SV=4                                               | 6  | 1  |
| Ras-related protein Rab-27A OS=Homo sapiens GN=RAB27A PE=1 SV=3                                             | 3  | 0  |
| Ras-related protein Rab-2A OS=Homo sapiens GN=RAB2A PE=1 SV=1                                               | 3  | 0  |
| Ras-related protein Rab-7a OS=Homo sapiens GN=RAB7A PE=1 SV=1                                               | 4  | 1  |
| Replication factor C subunit 4 OS=Homo sapiens GN=RFC4 PE=1 SV=2                                            | 3  | 0  |
| REST corepressor 1 OS=Homo sapiens GN=RCOR1 PE=1 SV=1                                                       | 4  | 1  |

|                                                                                                                                    |     |    |
|------------------------------------------------------------------------------------------------------------------------------------|-----|----|
| Rho-related GTP-binding protein RhoG OS=Homo sapiens GN=RHO G PE=1 SV=1                                                            | 3   | 0  |
| Ribonucleoside-diphosphate reductase large subunit OS=Homo sapiens GN=RRM1 PE=1 SV=1                                               | 2   | 1  |
| Ribosome biogenesis regulatory protein homolog OS=Homo sapiens GN=RRS1 PE=1 SV=2                                                   | 3   | 0  |
| RNA-binding protein 14 OS=Homo sapiens GN=RBM14 PE=1 SV=2                                                                          | 2   | 0  |
| RNA-binding protein EWS OS=Homo sapiens GN=EWSR1 PE=1 SV=1                                                                         | 7   | 3  |
| RNA-binding protein Raly OS=Homo sapiens GN=RALY PE=1 SV=1                                                                         | 2   | 0  |
| RuvB-like 1 OS=Homo sapiens GN=RUVBL1 PE=1 SV=1                                                                                    | 2   | 1  |
| RuvB-like 2 OS=Homo sapiens GN=RUVBL2 PE=1 SV=3                                                                                    | 10  | 5  |
| S1 RNA-binding domain-containing protein 1 OS=Homo sapiens GN=SRBD1 PE=1 SV=2                                                      | 8   | 1  |
| Sarcoplasmic/endoplasmic reticulum calcium ATPase 2 OS=Homo sapiens GN=ATP2A2 PE=1 SV=1                                            | 22  | 2  |
| Sequestosome-1 OS=Homo sapiens GN=SQSTM1 PE=1 SV=1                                                                                 | 101 | 0  |
| Serine/threonine-protein kinase 10 OS=Homo sapiens GN=STK10 PE=1 SV=1                                                              | 8   | 2  |
| Serine/threonine-protein kinase N1 OS=Homo sapiens GN=PKN1 PE=1 SV=2                                                               | 3   | 0  |
| Serine/threonine-protein kinase TBK1 OS=Homo sapiens GN=TBK1 PE=1 SV=1                                                             | 2   | 1  |
| Serine/threonine-protein phosphatase 2A 56 kDa regulatory subunit epsilon isoform OS=Homo sapiens GN=PPP2R5E PE=1 SV=1             | 2   | 0  |
| Serine/threonine-protein phosphatase 2A 65 kDa regulatory subunit A alpha isoform OS=Homo sapiens GN=PPP2R1A PE=1 SV=4             | 14  | 1  |
| Serine/threonine-protein phosphatase 2A catalytic subunit beta isoform OS=Homo sapiens GN=PPP2CB PE=1 SV=1                         | 7   | 1  |
| Serine/threonine-protein phosphatase 4 catalytic subunit OS=Homo sapiens GN=PPP4C PE=1 SV=1                                        | 2   | 0  |
| Serine/threonine-protein phosphatase 6 regulatory subunit 1 OS=Homo sapiens GN=SAPS1 PE=1 SV=5                                     | 4   | 0  |
| Serine/threonine-protein phosphatase 6 regulatory subunit 3 OS=Homo sapiens GN=SAPS3 PE=1 SV=2                                     | 2   | 0  |
| Serine/threonine-protein phosphatase PP1-gamma catalytic subunit OS=Homo sapiens GN=PPP1CC PE=1 SV=1                               | 4   | 0  |
| SH3 domain-binding glutamic acid-rich-like protein 3 OS=Homo sapiens GN=SH3BGL3 PE=1 SV=1                                          | 3   | 0  |
| Shugoshin-like 2 OS=Homo sapiens GN=SGOL2 PE=1 SV=2                                                                                | 11  | 0  |
| Sideroflexin-3 OS=Homo sapiens GN=SFXN3 PE=2 SV=1                                                                                  | 8   | 0  |
| Signal recognition particle 68 kDa protein OS=Homo sapiens GN=SRP68 PE=1 SV=2                                                      | 5   | 1  |
| Signal recognition particle 9 kDa protein OS=Homo sapiens GN=SRP9 PE=1 SV=2                                                        | 10  | 5  |
| Signal recognition particle receptor subunit alpha OS=Homo sapiens GN=SRPR PE=1 SV=2                                               | 10  | 2  |
| Signal recognition particle receptor subunit beta OS=Homo sapiens GN=SRPRB PE=1 SV=3                                               | 9   | 1  |
| Signal transducer and activator of transcription 3 OS=Homo sapiens GN=STAT3 PE=1 SV=2                                              | 8   | 0  |
| Small nuclear ribonucleoprotein E OS=Homo sapiens GN=SNRPE PE=1 SV=1                                                               | 6   | 2  |
| Small nuclear ribonucleoprotein F OS=Homo sapiens GN=SNRPF PE=1 SV=1                                                               | 3   | 0  |
| Small nuclear ribonucleoprotein G-like protein OS=Homo sapiens PE=3 SV=2                                                           | 5   | 2  |
| Small nuclear ribonucleoprotein Sm D3 OS=Homo sapiens GN=SNRPD3 PE=1 SV=1                                                          | 4   | 1  |
| Sodium/potassium-transporting ATPase subunit alpha-1 OS=Homo sapiens GN=ATP1A1 PE=1 SV=1                                           | 10  | 0  |
| Splicing factor 3B subunit 1 OS=Homo sapiens GN=SF3B1 PE=1 SV=3                                                                    | 8   | 2  |
| Splicing factor 3B subunit 3 OS=Homo sapiens GN=SF3B3 PE=1 SV=4                                                                    | 9   | 3  |
| Splicing factor 3B subunit 5 OS=Homo sapiens GN=SF3B5 PE=1 SV=1                                                                    | 3   | 0  |
| Splicing factor, arginine/serine-rich 13A OS=Homo sapiens GN=SFRS13A PE=1 SV=1                                                     | 3   | 0  |
| Splicing factor, arginine/serine-rich 2 OS=Homo sapiens GN=SFRS2 PE=1 SV=4                                                         | 18  | 7  |
| Splicing factor, arginine/serine-rich 3 OS=Homo sapiens GN=SFRS3 PE=1 SV=1                                                         | 15  | 2  |
| Splicing factor, arginine/serine-rich 7 OS=Homo sapiens GN=SFRS7 PE=1 SV=1                                                         | 9   | 3  |
| Squalene synthase OS=Homo sapiens GN=FDFT1 PE=1 SV=1                                                                               | 3   | 0  |
| Staphylococcal nuclease domain-containing protein 1 OS=Homo sapiens GN=SND1 PE=1 SV=1                                              | 9   | 3  |
| Stomatin-like protein 2 OS=Homo sapiens GN=STOML2 PE=1 SV=1                                                                        | 39  | 2  |
| Structural maintenance of chromosomes protein 1A OS=Homo sapiens GN=SMC1A PE=1 SV=2                                                | 29  | 11 |
| Structural maintenance of chromosomes protein 2 OS=Homo sapiens GN=SMC2 PE=1 SV=2                                                  | 14  | 4  |
| Structural maintenance of chromosomes protein 3 OS=Homo sapiens GN=SMC3 PE=1 SV=2                                                  | 39  | 12 |
| Superkiller viralicidal activity 2-like 2 OS=Homo sapiens GN=SKIV2L2 PE=1 SV=3                                                     | 6   | 2  |
| Surfeit locus protein 4 OS=Homo sapiens GN=SURF4 PE=1 SV=3                                                                         | 10  | 0  |
| Survival motor neuron protein OS=Homo sapiens GN=SMN1 PE=1 SV=1                                                                    | 3   | 0  |
| SWI/SNF complex subunit SMARCC1 OS=Homo sapiens GN=SMARCC1 PE=1 SV=3                                                               | 3   | 1  |
| SWI/SNF-related matrix-associated actin-dependent regulator of chromatin subfamily A member 5 OS=Homo sapiens GN=SMARCA5 PE=1 SV=1 | 3   | 0  |
| THUMP domain-containing protein 1 OS=Homo sapiens GN=THUMPD1 PE=1 SV=2                                                             | 2   | 0  |
| Thyroid receptor-interacting protein 13 OS=Homo sapiens GN=TRIP13 PE=1 SV=2                                                        | 4   | 0  |
| Titin OS=Homo sapiens GN=TTN PE=1 SV=2                                                                                             | 12  | 3  |
| Torsin-1A-interacting protein 1 OS=Homo sapiens GN=TOR1AIP1 PE=1 SV=2                                                              | 2   | 0  |
| Trans-2,3-enoyl-CoA reductase OS=Homo sapiens GN=TECR PE=1 SV=1                                                                    | 5   | 0  |
| Transcription elongation factor B polypeptide 1 OS=Homo sapiens GN=TCEB1 PE=1 SV=1                                                 | 3   | 1  |
| Transcription elongation factor SPT5 OS=Homo sapiens GN=SUPT5H PE=1 SV=1                                                           | 5   | 0  |
| Transcription elongation regulator 1 OS=Homo sapiens GN=TCERG1 PE=1 SV=2                                                           | 5   | 1  |

|                                                                                                                   |     |    |
|-------------------------------------------------------------------------------------------------------------------|-----|----|
| Transcription intermediary factor 1-beta OS=Homo sapiens GN=TRIM28 PE=1 SV=5                                      | 14  | 6  |
| Transferrin receptor protein 1 OS=Homo sapiens GN=TFRC PE=1 SV=2                                                  | 4   | 1  |
| Transitional endoplasmic reticulum ATPase OS=Homo sapiens GN=VCP PE=1 SV=4                                        | 138 | 10 |
| Translation initiation factor eIF-2B subunit delta OS=Homo sapiens GN=EIF2B4 PE=1 SV=2                            | 2   | 0  |
| Translocon-associated protein subunit alpha OS=Homo sapiens GN=SSR1 PE=1 SV=3                                     | 2   | 1  |
| Translocon-associated protein subunit delta OS=Homo sapiens GN=SSR4 PE=1 SV=1                                     | 11  | 1  |
| Transmembrane 9 superfamily member 3 OS=Homo sapiens GN=TM9SF3 PE=1 SV=2                                          | 6   | 0  |
| Transmembrane protein 160 OS=Homo sapiens GN=TMEM160 PE=2 SV=1                                                    | 54  | 0  |
| Transmembrane protein 192 OS=Homo sapiens GN=TMEM192 PE=1 SV=1                                                    | 2   | 0  |
| Transmembrane protein 33 OS=Homo sapiens GN=TMEM33 PE=1 SV=2                                                      | 4   | 0  |
| tRNA (cytosine-5-)-methyltransferase NSUN2 OS=Homo sapiens GN=NSUN2 PE=1 SV=2                                     | 19  | 3  |
| tRNA methyltransferase 112 homolog OS=Homo sapiens GN=TRMT112 PE=1 SV=1                                           | 3   | 1  |
| tRNA-dihydrouridine synthase 3-like OS=Homo sapiens GN=DUS3L PE=1 SV=2                                            | 4   | 2  |
| Tubulin alpha-1B chain OS=Homo sapiens GN=TUBA1B PE=1 SV=1                                                        | 201 | 51 |
| Tubulin beta chain OS=Homo sapiens GN=TUBB PE=1 SV=2                                                              | 281 | 67 |
| Tubulin beta-2C chain OS=Homo sapiens GN=TUBB2C PE=1 SV=1                                                         | 18  | 0  |
| Tyrosine-protein kinase BTK OS=Homo sapiens GN=BTK PE=1 SV=3                                                      | 3   | 1  |
| Tyrosine-protein kinase Lyn OS=Homo sapiens GN=LYN PE=1 SV=3                                                      | 8   | 3  |
| Tyrosyl-tRNA synthetase, cytoplasmic OS=Homo sapiens GN=YARS PE=1 SV=4                                            | 8   | 1  |
| U1 small nuclear ribonucleoprotein C OS=Homo sapiens GN=SNRPC PE=1 SV=1                                           | 6   | 0  |
| U2 small nuclear ribonucleoprotein A' OS=Homo sapiens GN=SNRPA1 PE=1 SV=2                                         | 4   | 1  |
| Ubiquitin-like modifier-activating enzyme 1 OS=Homo sapiens GN=UBA1 PE=1 SV=3                                     | 4   | 2  |
| Ubiquitin-like protein 5 OS=Homo sapiens GN=UBL5 PE=1 SV=1                                                        | 2   | 0  |
| UDP-N-acetylglucosamine--peptide N-acetylglucosaminyltransferase 110 kDa subunit OS=Homo sapiens GN=OGT PE=1 SV=3 | 4   | 0  |
| Up-regulated during skeletal muscle growth protein 5 OS=Homo sapiens GN=USMG5 PE=1 SV=1                           | 5   | 1  |
| Valyl-tRNA synthetase OS=Homo sapiens GN=VAR5 PE=1 SV=4                                                           | 16  | 6  |
| Vasodilator-stimulated phosphoprotein OS=Homo sapiens GN=VASP PE=1 SV=3                                           | 3   | 0  |
| Vesicle-trafficking protein SEC22b OS=Homo sapiens GN=SEC22B PE=1 SV=3                                            | 2   | 0  |
| Vigilin OS=Homo sapiens GN=HDLBP PE=1 SV=2                                                                        | 4   | 1  |
| Voltage-dependent anion-selective channel protein 2 OS=Homo sapiens GN=VDAC2 PE=1 SV=2                            | 10  | 4  |
| Voltage-dependent anion-selective channel protein 3 OS=Homo sapiens GN=VDAC3 PE=1 SV=1                            | 4   | 2  |
| WASH complex subunit strumpellin OS=Homo sapiens GN=KIAA0196 PE=1 SV=1                                            | 2   | 1  |
| WD repeat- and FYVE domain-containing protein 4 OS=Homo sapiens GN=WDFY4 PE=1 SV=3                                | 3   | 1  |
| WD repeat-containing protein 11 OS=Homo sapiens GN=WDR11 PE=1 SV=1                                                | 2   | 0  |
| WD repeat-containing protein 61 OS=Homo sapiens GN=WDR61 PE=1 SV=1                                                | 2   | 1  |
| Zinc finger BED domain-containing protein 1 OS=Homo sapiens GN=ZBED1 PE=1 SV=1                                    | 34  | 0  |
| Zyxin OS=Homo sapiens GN=ZYX PE=1 SV=1                                                                            | 6   | 3  |
