# Supplementary material
Source: PubMed Central journal article supplement (PMC5332301)
Supplement: NIHMS816937-supplement-3.pdf [file NIHMS816937-supplement-3.pdf]

**Supplemental Figure S1C.**

**Proteins identified in both the Molm14 and TF-1 screens.**

|                                                                                                                 | TF1:ITD<br># of<br>peptides | TF1<br># of<br>peptides | Molm14 #<br>of<br>peptides | IgG<br># of<br>peptides | Subcellular Location       | Function                                   |
|-----------------------------------------------------------------------------------------------------------------|-----------------------------|-------------------------|----------------------------|-------------------------|----------------------------|--------------------------------------------|
| 2',3'-cyclic-nucleotide 3'-phosphodiesterase OS=Homo sapiens GN=CNP PE=1 SV=2                                   | 4                           | 0                       | 2                          | 0                       | membranes                  | Microtubule distribution                   |
| 40S ribosomal protein S27 OS=Homo sapiens GN=RPS27 PE=1 SV=3                                                    | 26                          | 6                       | 2                          | 0                       | cytoplasm/nucleus          | Component of ribosome                      |
| 60S ribosomal protein L4 OS=Homo sapiens GN=RPL4 PE=1 SV=5                                                      | 42                          | 9                       | 43                         | 11                      | cytoplasm/nucleus          | Component of ribosome                      |
| Annexin A2 OS=Homo sapiens GN=ANXA2 PE=1 SV=2                                                                   | 5                           | 1                       | 12                         | 6                       | membranes/secreted         | Stress response                            |
| ATP-dependent RNA helicase DDX18 OS=Homo sapiens GN=DDX18 PE=1 SV=2                                             | 14                          | 6                       | 28                         | 14                      | Nucleus                    |                                            |
| Calnexin OS=Homo sapiens GN=CANX PE=1 SV=2                                                                      | 46                          | 4                       | 6                          | 1                       | ER/membranes               | Interacts with glycoproteins in the Golgi  |
| Cell division cycle protein 16 homolog OS=Homo sapiens GN=CDC16 PE=1 SV=2                                       | 3                           | 1                       | 2                          | 0                       | centrosome/mitotic spindle | Controls progression through G1            |
| Coatmer subunit alpha OS=Homo sapiens GN=COPA PE=1 SV=2                                                         | 18                          | 0                       | 6                          | 1                       | cytoplasm/Golgi            | ER to Golgi transport                      |
| Constitutive activator of peroxisome proliferator-activated receptor gamma OS=Homo sapiens GN=FAM120B PE=1 SV=1 | 6                           | 0                       | 5                          | 1                       | Nucleus                    |                                            |
| Cytoplasmic dynein 1 heavy chain 1 OS=Homo sapiens GN=DYNC1H1 PE=1 SV=5                                         | 4                           | 0                       | 10                         | 0                       | cytoplasm                  | Vesicle motility                           |
| Cytoskeleton-associated protein 4 OS=Homo sapiens GN=CKAP4 PE=1 SV=2                                            | 9                           | 2                       | 5                          | 1                       | ER/membranes/cytoplasm     | Anchoring of the ER to microtubules        |
| Cytoskeleton-associated protein 5 OS=Homo sapiens GN=CKAP5 PE=1 SV=3                                            | 10                          | 0                       | 36                         | 14                      | centrosome/mitotic spindle | Spindle pole organization                  |
| Dedicator of cytokinesis protein 2 OS=Homo sapiens GN=DOCK2 PE=1 SV=2                                           | 6                           | 0                       | 16                         | 1                       | cytoplasm/membrane         | GEF: activation of RAC1 & RAC2             |
| DNA topoisomerase 2-beta OS=Homo sapiens GN=TOP2B PE=1 SV=3                                                     | 18                          | 5                       | 144                        | 70                      | cytoplasm/nucleus          | Breakage and re-joining of ds DNA          |
| Dnaj homolog subfamily A member 1 OS=Homo sapiens GN=DNAJA1 PE=1 SV=2                                           | 5                           | 1                       | 2                          | 0                       | cytoplasm/ER/nucleus       | Co-chaperone for HSPA8/Hsc70               |
| Dnaj homolog subfamily A member 2 OS=Homo sapiens GN=DNAJA2 PE=1 SV=1                                           | 6                           | 0                       | 2                          | 1                       | membranes                  | Chaperone binding                          |
| Dolichyl-diphosphooligosaccharide--protein glycosyltransferase subunit 1 OS=Homo sapiens GN=RPN1 PE=1 SV=1      | 14                          | 3                       | 17                         | 6                       | ER                         | Glycosylation                              |
| Endoplasmic reticulum chaperone protein 90B1 OS=Homo sapiens GN=HSP90B1 PE=1 SV=1                               | 3                           | 0                       | 5                          | 2                       | ER                         | Chaperone                                  |
| Enhancer of mRNA-decapping protein 4 OS=Homo sapiens GN=EDC4 PE=1 SV=1                                          | 3                           | 0                       | 4                          | 2                       | cytoplasm/nucleus          | mRNA degradation                           |
| Eukaryotic translation initiation factor 2 subunit 2-like protein OS=Homo sapiens PE=1 SV=1                     | 3                           | 0                       | 16                         | 8                       | cytoplasm                  | Protein synthesis                          |
| Ezrin OS=Homo sapiens GN=EZR PE=1 SV=4                                                                          | 6                           | 3                       | 4                          | 1                       | cytoplasm/cell projections | Formation of microvilli & membrane ruffles |
| Far upstream element-binding protein 1 OS=Homo sapiens GN=FUBP1 PE=1 SV=3                                       | 6                           | 0                       | 4                          | 2                       | Nucleus                    |                                            |
| Flt cytokine receptor OS=Homo sapiens GN=FLT3 PE=1 SV=2                                                         | 609                         | 0                       | 69                         | 0                       | membrane/ER                | Cell differentiation/proliferation         |
| Fragile X mental retardation syndrome-related protein 1 OS=Homo sapiens GN=FXR1 PE=1 SV=3                       | 6                           | 1                       | 10                         | 0                       | cytoplasm                  | RNA-binding protein                        |
| GRIP and coiled-coil domain-containing protein 2 OS=Homo sapiens GN=GCC2 PE=1 SV=3                              | 3                           | 0                       | 47                         | 11                      | cytoplasm/Golgi            | ER to Golgi transport                      |
| Guanine nucleotide-binding protein G(I)/G(S)/G(T) subunit beta-2 OS=Homo sapiens GN=GNB2 PE=1 SV=3              | 4                           | 2                       | 5                          | 1                       | cytoplasm                  | GTPase activity                            |
| Heat shock protein HSP 90-alpha OS=Homo sapiens GN=HSP90AA1 PE=1 SV=5                                           | 66                          | 2                       | 14                         | 7                       | cytoplasm/membrane         | Chaperone                                  |
| Heterogeneous nuclear ribonucleoprotein U-like protein 2 OS=Homo sapiens GN=HNRNPUL2 PE=1 SV=1                  | 6                           | 1                       | 8                          | 3                       | Nucleus                    |                                            |
| Histone H1.5 OS=Homo sapiens GN=HIST1H1B PE=1 SV=3                                                              | 28                          | 6                       | 3                          | 1                       | Nucleus                    |                                            |
| Hsp90 co-chaperone Cdc37 OS=Homo sapiens GN=CDC37 PE=1 SV=1                                                     | 19                          | 0                       | 2                          | 0                       | cytoplasm                  | Co-chaperone with Hsp90                    |
| Importin-7 OS=Homo sapiens GN=IPO7 PE=1 SV=1                                                                    | 17                          | 0                       | 21                         | 3                       | cytoplasm/nucleus          | Nuclear protein import                     |
| L-lactate dehydrogenase B chain OS=Homo sapiens GN=LDHB PE=1 SV=2                                               | 2                           | 0                       | 5                          | 2                       | cytoplasm                  | Pyruvate fermentation                      |
| Low affinity immunoglobulin gamma Fc region receptor II-a OS=Homo sapiens GN=FCGR2A PE=1 SV=4                   | 10                          | 0                       | 9                          | 4                       | membranes                  | Binds Fc-gamma receptor/phagocytosis       |
| Lupus La protein OS=Homo sapiens GN=SSB PE=1 SV=2                                                               | 4                           | 0                       | 24                         | 10                      | Nucleus                    |                                            |
| Mannosyl-oligosaccharide glucosidase OS=Homo sapiens GN=MOGS PE=1 SV=5                                          | 4                           | 2                       | 2                          | 0                       | ER                         | N-glycan degradation                       |
| Nucleolar protein 56 OS=Homo sapiens GN=NOP56 PE=1 SV=4                                                         | 3                           | 1                       | 23                         | 4                       | cytoplasm/nucleus          | Ribosomal biogenesis                       |
| Nucleolar protein 6 OS=Homo sapiens GN=NOL6 PE=1 SV=2                                                           | 5                           | 0                       | 4                          | 2                       | Nucleus                    |                                            |
| Pescadillo homolog OS=Homo sapiens GN=PES1 PE=1 SV=1                                                            | 7                           | 1                       | 6                          | 2                       | Nucleus                    |                                            |
| Phenylalanyl-tRNA synthetase beta chain OS=Homo sapiens GN=FARSB PE=1 SV=3                                      | 5                           | 1                       | 7                          | 1                       | cytoplasm                  | Protein synthesis                          |
| Phosphorylase b kinase gamma catalytic chain, testis/liver isoform OS=Homo sapiens GN=PHKG2 PE=1 SV=1           | 5                           | 0                       | 5                          | 2                       | cytoplasm                  | Glycogen breakdown                         |
| Phosphorylase b kinase regulatory subunit alpha, liver isoform OS=Homo sapiens GN=PHKA2 PE=1 SV=1               | 40                          | 0                       | 39                         | 19                      | membranes                  | Serine phosphorylation                     |
| Profilin-1 OS=Homo sapiens GN=PFN1 PE=1 SV=2                                                                    | 4                           | 1                       | 4                          | 2                       | cytoplasm                  | Actin binding                              |
| Protein arginine N-methyltransferase 5 OS=Homo sapiens GN=PRMT5 PE=1 SV=4                                       | 3                           | 0                       | 6                          | 2                       | cytoplasm/Golgi/nucleus    | Methyltransferase                          |
| Protein furry homolog OS=Homo sapiens GN=FRY PE=1 SV=1                                                          | 4                           | 1                       | 6                          | 3                       | cytoplasm                  | Actin cytoskeleton dynamics                |
| Protein kinase C iota type OS=Homo sapiens GN=PRKCI PE=1 SV=2                                                   | 3                           | 0                       | 5                          | 2                       | cytoplasm/membrane         | Phospholipid binding                       |
| Protein-L-isoaspartate(D-aspartate) O-methyltransferase OS=Homo sapiens GN=PCMT1 PE=1 SV=3                      | 13                          | 3                       | 6                          | 1                       | cytoplasm/ER               | Methyltransferase; chromatin regulator     |
| Rab GTPase-activating protein 1 OS=Homo sapiens GN=RABGAP1 PE=1 SV=3                                            | 39                          | 0                       | 41                         | 18                      | cytoplasm                  | Rab GTPase activator                       |
| Ras-related protein Rab-5C OS=Homo sapiens GN=RAB5C PE=1 SV=2                                                   | 4                           | 1                       | 5                          | 2                       | membranes                  | Vesicular traffic                          |
| Ras-related protein Rap-1b OS=Homo sapiens GN=RAP1B PE=1 SV=1                                                   | 4                           | 0                       | 5                          | 2                       | plasma membrane            | GTPase activity; cell polarity             |
| Ribonuclease inhibitor OS=Homo sapiens GN=RNH1 PE=1 SV=2                                                        | 8                           | 2                       | 4                          | 1                       | cytoplasm                  | endonuclease                               |
| Ribosomal L1 domain-containing protein 1 OS=Homo sapiens GN=RSL1D1 PE=1 SV=3                                    | 4                           | 0                       | 7                          | 0                       | Nucleus                    |                                            |
| RNA-binding protein 42 OS=Homo sapiens GN=RBM42 PE=1 SV=1                                                       | 2                           | 1                       | 7                          | 1                       | cytoplasm/nucleus          | RNA binding                                |
| SAM domain and HD domain-containing protein 1 OS=Homo sapiens GN=SAMHD1 PE=1 SV=2                               | 19                          | 9                       | 2                          | 1                       | Nucleus                    |                                            |
| Serpin H1 OS=Homo sapiens GN=SERPINH1 PE=1 SV=2                                                                 | 3                           | 0                       | 2                          | 1                       | ER                         | Chaperone; binds collagen                  |
| Signal transducer and activator of transcription 1-alpha/beta OS=Homo sapiens GN=STAT1 PE=1 SV=2                | 3                           | 0                       | 5                          | 0                       | cytoplasm/nucleus          | Response to cytokines & growth factors     |
| Sister chromatid cohesion protein PDS5 homolog A OS=Homo sapiens GN=PDS5A PE=1 SV=1                             | 4                           | 1                       | 5                          | 1                       | Nucleus                    |                                            |
| Spermatogenesis-associated protein 5 OS=Homo sapiens GN=SPATA5 PE=1 SV=2                                        | 3                           | 0                       | 10                         | 5                       | cytoplasm/mitochondrion    | spermatogenesis                            |
| Splicing factor, arginine/serine-rich 6 OS=Homo sapiens GN=SFRS6 PE=1 SV=2                                      | 8                           | 0                       | 3                          | 1                       | Nucleus                    |                                            |
| Structural maintenance of chromosomes protein 4 OS=Homo sapiens GN=SMC4 PE=1 SV=2                               | 7                           | 2                       | 6                          | 3                       | cytoplasm/nucleus          | DNA condensation                           |
| Transducin beta-like protein 2 OS=Homo sapiens GN=TBL2 PE=1 SV=1                                                | 7                           | 1                       | 6                          | 3                       | ER                         | Stress response                            |
| Tripartite motif-containing protein 9 OS=Homo sapiens GN=TRIM9 PE=1 SV=1                                        | 6                           | 0                       | 8                          | 0                       | cytoplasm                  | Signal for proteasomal degradation         |
| Tubulin alpha-4A chain OS=Homo sapiens GN=TUBA4A PE=1 SV=1                                                      | 4                           | 0                       | 9                          | 1                       | cytoplasm                  | Component of microtubules                  |
| Tubulin beta-6 chain OS=Homo sapiens GN=TUBB6 PE=1 SV=1                                                         | 5                           | 0                       | 5                          | 1                       | cytoplasm                  | Component of microtubules                  |
| Tyrosine-protein phosphatase non-receptor type 6 OS=Homo sapiens GN=PTPN6 PE=1 SV=1                             | 6                           | 2                       | 3                          | 1                       | cytoplasm/nucleus          | Modulates signaling by tyrosine kinases    |
| U5 small nuclear ribonucleoprotein 200 kDa helicase OS=Homo sapiens GN=SNRNP200 PE=1 SV=2                       | 7                           | 0                       | 13                         | 4                       | Nucleus                    |                                            |
