# Supplementary material
Source: PubMed Central journal article supplement (PMC5332301)
Supplement: NIHMS816937-supplement-5.pdf [file NIHMS816937-supplement-5.pdf]

# Supplemental Figure S3.

A.

HB11;19

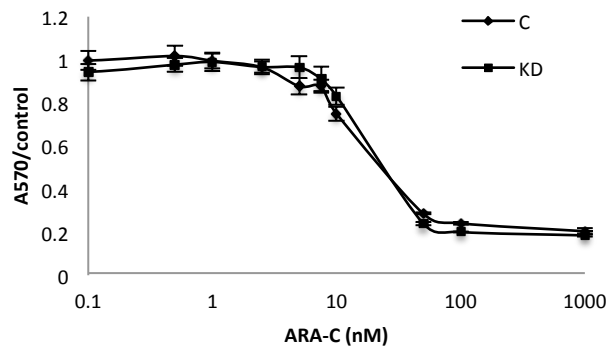

REH

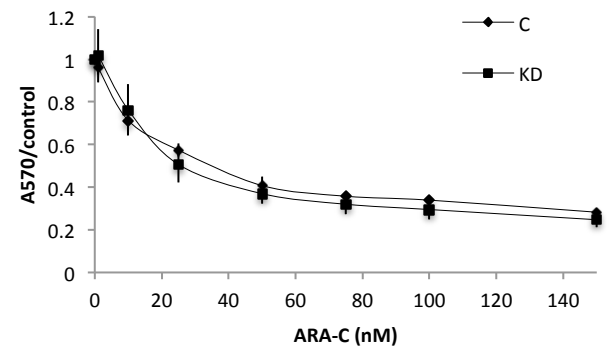

MV4;11

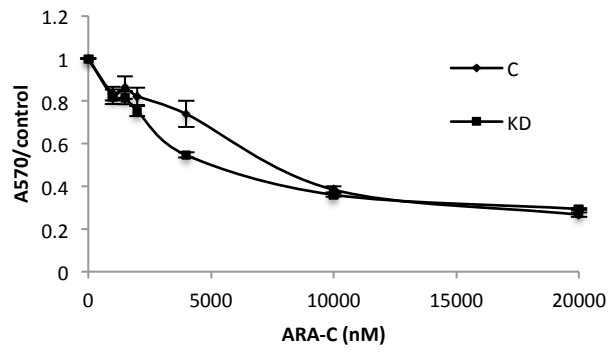

SEM K2

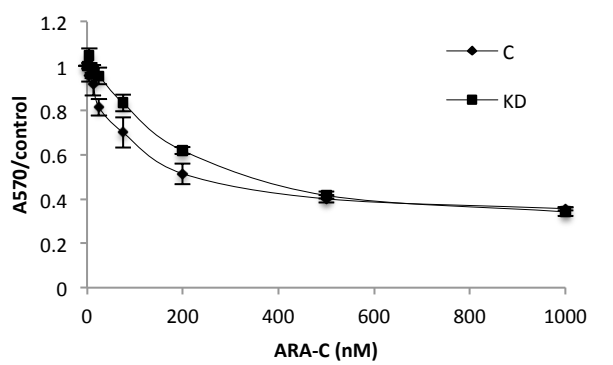

K562

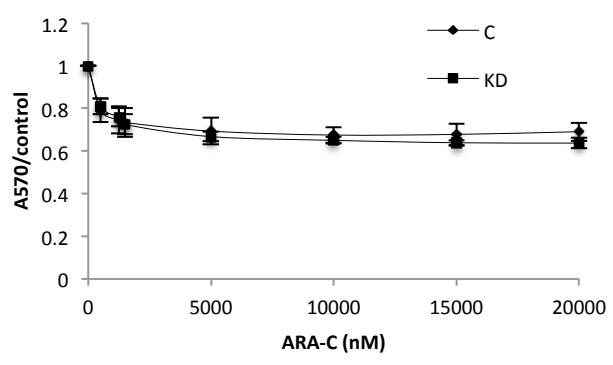

Molm 14

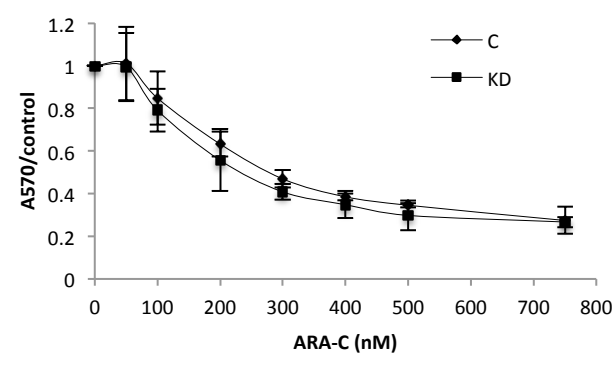

TF-1

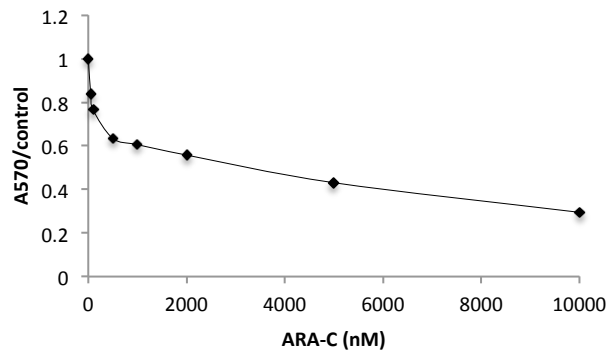

B.

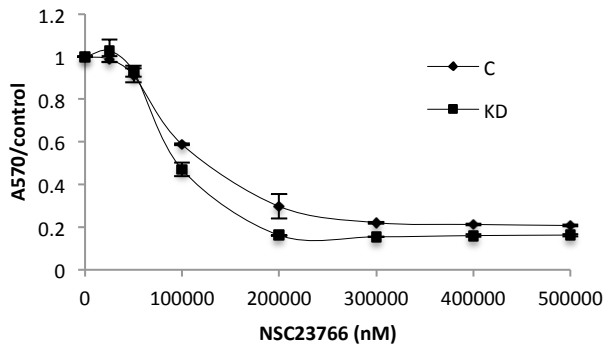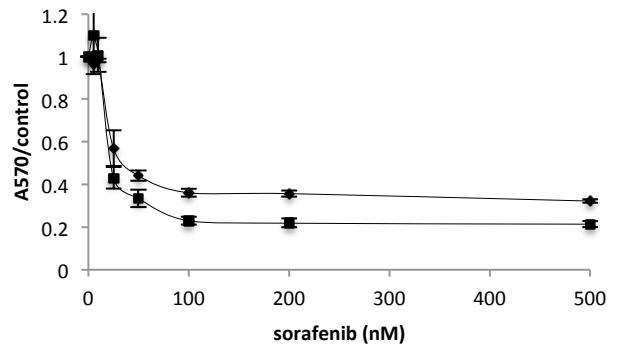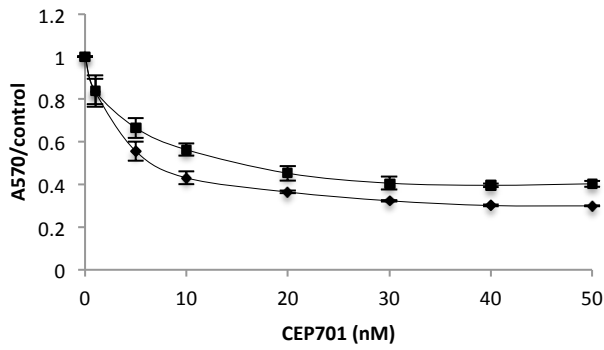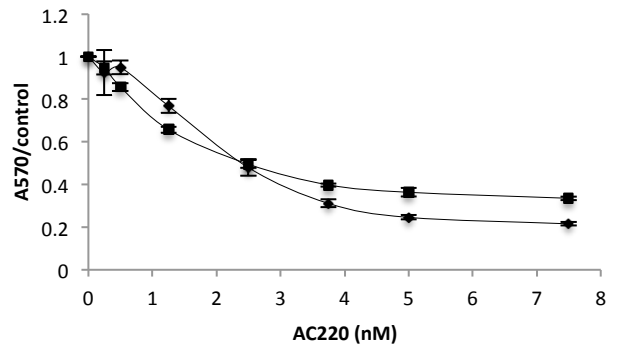

Figure S3. MTT assays of cell lines in response to ARA-C (A) and of MV4;11 cells in response to FLT3-TKIs and NSC23766 (B). All measurements were performed 48 hours after the addition of drugs.
