# Supplementary material
Source: PubMed Central journal article supplement (PMC5332301)
Supplement: NIHMS816937-supplement-6.pdf [file NIHMS816937-supplement-6.pdf]

## Supplemental Figure S4.

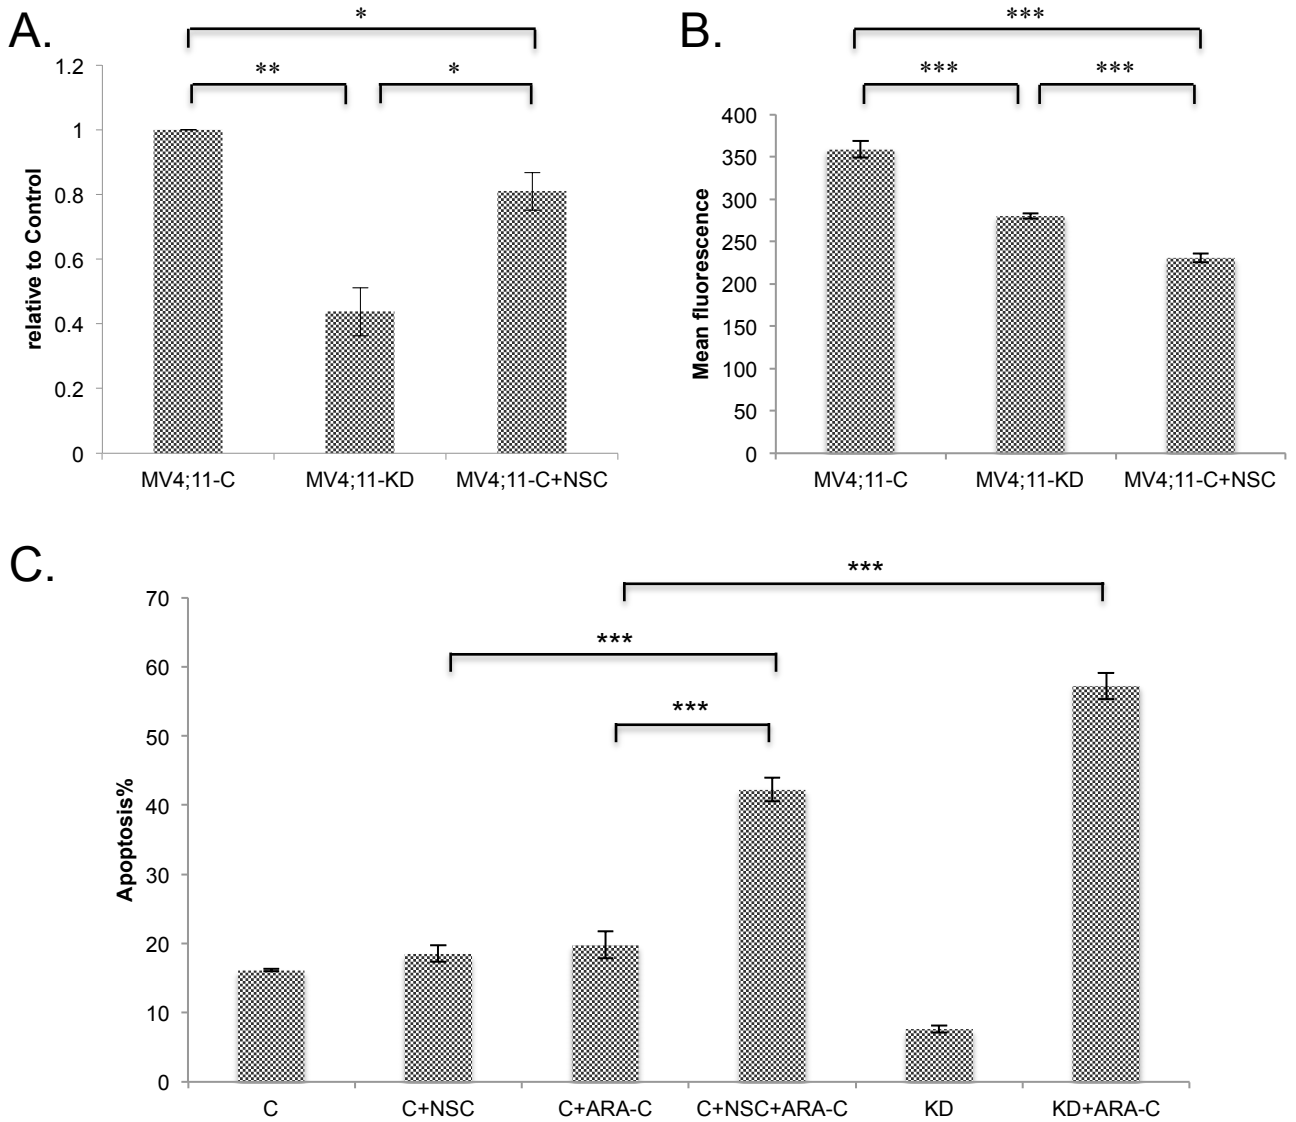

Figure S4. DOCK2 knock-down and Rac inhibitor NSC23766 showed similar effects in MV4;11 cells. The effects of DOCK2 knock-down and NSC23766 on Rac1 activity (A), reactive oxygen species (ROS) level (B), and percentage of apoptosis in response to ARA-C treatment (48 hr) (C) were measured in MV4;11 cells. C: control shRNA; KD: shRNA against DOCK2; NSC: NSC23766. \*:  $P \leq 0.05$ ; \*\*:  $P \leq 0.01$ ; \*\*\*:  $P \leq 0.001$ .
